# Supplementary material for: Deciphering the Glycosylation Steps in the Biosynthesis of P-1894B and Grincamycin Isolated from Marine-Derived Streptomyces lusitanus SCSIO LR32
Source: MDPI journal article supplement (doi:10.3390/md22010032), 2024-01-02

## Supplementary Materials

# Deciphering the Glycosylation Steps in the Biosynthesis of P-1894B and Grincamycin Isolated from Marine-derived *Streptomyces lusitanus* SCSIO LR32.

Hongbo Huang <sup>1,2,†</sup>, Yun Zhang <sup>2,†</sup>, Yongxiang Song <sup>2</sup>, Chunyao Ling <sup>2</sup>, Siyan Peng <sup>1</sup>, Bo Ding <sup>1</sup>, Yiwen Tao <sup>1,\*</sup> and Jianhua Ju <sup>2,3,\*</sup>

<sup>1</sup> Guangzhou Municipal and Guangdong Provincial Key Laboratory of Molecular Target and Clinical Pharmacology, the NMPA and State Key Laboratory of Respiratory Disease, School of Pharmaceutical Sciences and the Fifth Affiliated Hospital, Guangzhou Medical University, Guangzhou 511436, China; huanghb@gzhmu.edu.cn (H. H.), 18054290097@163.com (S.P.), dingbo-dmy@gzhmu.edu.cn (B.D.)

<sup>2</sup> CAS Key Laboratory of Tropical Marine Bio-resources and Ecology, Guangdong Key Laboratory of Marine Materia Medica, RNAM Center for Marine Microbiology, South China Sea Institute of Oceanology, Chinese Academy of Sciences, Guangzhou 510301, China; zhangyun@scsio.ac.cn (Y.Z.), songx@scsio.ac.cn (Y.S.), lingchunyao071@163.com (C.L.)

<sup>3</sup> School of Pharmaceutical Sciences, Shandong University, Jinan 250100, China

† Huang H. and Zhang Y. contributed equally.

\* Correspondence: jjju@scsio.ac.cn(J.J.), Tel.: +86-20-89023028 (J.J.); yywentao@aliyun.com(Y.T.), Tel.: +86-20-37103255 (Y.T.)

**Abstract:** Recently, we re-isolated the glycosylated angucycline antibiotics P-1894B (**1**) and grincamycin (**1'**) from the marine-derived *Streptomyces lusitanus* SCSIO LR32 as potent antitumor agents and identified their biosynthesis gene cluster *gcn*. Both P-1894B (**1**) and grincamycin (**1'**) possess a trisaccharide and a disaccharide moiety comprised of five deoxysugars. In this work, three genes encoding glycosyltransferases (GcnG1, GcnG2, and GcnG3) responsible for the assembly of deoxysugars into angucycline aglycone were identified from the biosynthesis gene cluster *gcn*. Gene inactivations of *gcnG1*, *gcnG2*, *gcnG3*, and *gcnG1G2* by lambda-RED-mediated gene replacements led to the construction of four mutants, in which the glycosyltransferase genes were disrupted, respectively. The metabolites from the mutants were purified and identified, including two new analogues designated as grincamycin U (**3a**) and V (**3'**). The sequential glycosylation steps in the biosynthesis of P-1894B (**1**) and grincamycin (**1'**) catalyzed by GcnG3, GcnG1, and GcnG2 were elucidated.

**Keywords:** angucycline; glycosylation; biosynthesis; P-1894B; grincamycin; marine *Streptomyces*

## Table of Contents

| Tables            | Content                                                                                                                  | Page |
|-------------------|--------------------------------------------------------------------------------------------------------------------------|------|
| <b>Table S1</b>   | Deduced functions of ORFs containing <i>gcnG1~G3</i> and <i>gcnQ</i> genes in the grincamycin biosynthetic gene cluster. | S3   |
| <b>Table S2</b>   | Bacteria and plasmid used in this study.                                                                                 | S3   |
| <b>Table S3</b>   | The primer pairs used for mutant construction.                                                                           | S4   |
| <b>Table S4</b>   | The primers used for PCR confirmation of the double-crossover mutants.                                                   | S4   |
| <b>Figures</b>    |                                                                                                                          |      |
| <b>Figure S1</b>  | Gene inactivation of <i>gcnG3~gcnG1</i> , and <i>gcnG1G2</i> .                                                           | S5   |
| <b>Figure S2</b>  | Procedure for isolation of compound from the mutant $\Delta gcnG3$ .                                                     | S5   |
| <b>Figure S3</b>  | Procedure for isolation of compounds from the mutant $\Delta gcnG2$ .                                                    | S6   |
| <b>Figure S4</b>  | Procedure for isolation of compound from the mutant $\Delta gcnG1$ .                                                     | S6   |
| <b>Figure S5</b>  | Procedure for isolation of compound from the mutant $\Delta gcnG1G2$ .                                                   | S7   |
| <b>Figure S6</b>  | The UV spectrum of grincamycin U ( <b>3a</b> ).                                                                          | S7   |
| <b>Figure S7</b>  | The (-)HR-ESI-MS spectrum of grincamycin U ( <b>3a</b> ).                                                                | S7   |
| <b>Figure S8</b>  | The $^1\text{H}$ NMR (700 MHz) spectrum of grincamycin U ( <b>3a</b> ) in $\text{CD}_3\text{OD}$ .                       | S8   |
| <b>Figure S9</b>  | The $^{13}\text{C}$ NMR (175 MHz) spectrum of grincamycin U ( <b>3a</b> ) in $\text{CD}_3\text{OD}$ .                    | S9   |
| <b>Figure S10</b> | The DEPT-135 (175 MHz) spectrum of grincamycin U ( <b>3a</b> ) in $\text{CD}_3\text{OD}$ .                               | S10  |
| <b>Figure S11</b> | The COSY NMR spectrum of grincamycin U ( <b>3a</b> ) in $\text{CD}_3\text{OD}$ .                                         | S11  |
| <b>Figure S12</b> | The HMQC NMR spectrum of grincamycin U ( <b>3a</b> ) in $\text{CD}_3\text{OD}$ .                                         | S12  |
| <b>Figure S13</b> | The HMBC NMR spectrum of grincamycin U ( <b>3a</b> ) in $\text{CD}_3\text{OD}$ .                                         | S13  |
| <b>Figure S14</b> | The NOESY NMR spectrum of grincamycin U ( <b>3a</b> ) in $\text{CD}_3\text{OD}$ .                                        | S14  |
| <b>Figure S15</b> | The UV spectrum of grincamycin V ( <b>3'</b> ).                                                                          | S15  |
| <b>Figure S16</b> | The (-)HR-ESI-MS spectrum of grincamycin V ( <b>3'</b> ).                                                                | S15  |
| <b>Figure S17</b> | The $^1\text{H}$ NMR (700 MHz) spectrum of grincamycin V ( <b>3'</b> ) in $\text{CD}_3\text{OD}$ .                       | S16  |
| <b>Figure S18</b> | The $^{13}\text{C}$ NMR (175 MHz) spectrum of grincamycin V ( <b>3'</b> ) in $\text{CD}_3\text{OD}$ .                    | S17  |
| <b>Figure S19</b> | The DEPT-135 (175 MHz) spectrum of grincamycin V ( <b>3'</b> ) in $\text{CD}_3\text{OD}$ .                               | S18  |
| <b>Figure S20</b> | The COSY NMR spectrum of grincamycin V ( <b>3'</b> ) in $\text{CD}_3\text{OD}$ .                                         | S19  |
| <b>Figure S21</b> | The HMQC NMR spectrum of grincamycin V ( <b>3'</b> ) in $\text{CD}_3\text{OD}$ .                                         | S20  |
| <b>Figure S22</b> | The HMBC NMR spectrum of grincamycin V ( <b>3'</b> ) in $\text{CD}_3\text{OD}$ .                                         | S21  |
| <b>Figure S23</b> | The NOESY NMR spectrum of grincamycin V ( <b>3'</b> ) in $\text{CD}_3\text{OD}$ .                                        | S22  |

**Table S1.** Deduced functions of ORFs containing *gcnG1~G3* and *gcnQ* genes in the grincamycin biosynthetic gene cluster.

| gene         | Size(a.a) | Proposed function                  | Protein homologue and origin                    | Identity/ similarity | accession number |
|--------------|-----------|------------------------------------|-------------------------------------------------|----------------------|------------------|
| <i>gcnG1</i> | 430       | O-Glycosyltransferase              | SaqGT2[ <i>Micromonospora</i> sp. Tu 6368]      | 54/69                | ACP19363.1       |
| <i>gcnG2</i> | 404       | O-Glycosyltransferases             | SaqGT4[ <i>Micromonospora</i> sp. Tu 6368]      | 58/70                | ACP19365.1       |
| <i>gcnG3</i> | 376       | C-Glycosyltransferase              | UrdGT2[ <i>Streptomyces fradiae</i> Tue2717]    | 79/85                | AAF00209.1       |
| <i>gcnQ</i>  | 529       | FAD/FMN-containin-g dehydrogenases | AknOx[ <i>Streptomyces galilaeus</i> ATCC31615] | 56/69                | ABI15166.1       |

**Table S2.** Bacteria and plasmid used in this study.

| Strains        | Description                                                                                                                | Reference or source |
|----------------|----------------------------------------------------------------------------------------------------------------------------|---------------------|
| <i>E. coli</i> |                                                                                                                            |                     |
| ET12567        | <i>dam</i> , <i>dcm</i> , <i>hsdS</i> , <i>cat</i> , <i>tet</i>                                                            | [MacNeil, 1992]     |
| BW25113        | K12 derivative: <i>araBAD</i> , <i>rhaBAD</i>                                                                              | [Datsenko, 2000]    |
| Plasmids       |                                                                                                                            |                     |
| pCR2.1         | Amp <sup>r</sup> , Kan <sup>r</sup> , general clone vector                                                                 | Invitrogen          |
| pIJ790         | CmI <sup>r</sup> , including $\lambda$ -RED ( <i>gam</i> , <i>bet</i> , <i>exo</i> ) for PCR-targeting                     | This study          |
| pIJ773         | <i>aac(3)IV</i> (ApraR), <i>oriT</i>                                                                                       | This study          |
| pUZ8002        | <i>tra</i> , <i>neo</i> , <i>RP4</i>                                                                                       | [Paget, 1999]       |
| Cosmid         |                                                                                                                            |                     |
| 228A           | <i>Streptomyces lusitanus</i> SCSIO LR32 genomic library cosmid                                                            | This study          |
| pJu4014        | 228A cosmid derivative where <i>gcnG1</i> was disrupted by <i>aac(3)IV</i> + <i>oriT</i> using primers G1delF and G1delR   | This study          |
| pJu4015        | 228A cosmid derivative where <i>gcnG2</i> was disrupted by <i>aac(3)IV</i> + <i>oriT</i> using primers G2delF and G2delR   | This study          |
| pJu4016        | 228A cosmid derivative where <i>gcnG1G2</i> was disrupted by <i>aac(3)IV</i> + <i>oriT</i> using primers G1delF and G2delR | This study          |
| pJu4017        | 228A cosmid derivative where <i>gcnG3</i> was disrupted by <i>aac(3)IV</i> + <i>oriT</i> using primers G3delF and G3delR   | This study          |

**Table S3.** The primer pairs used for mutant construction.

| Gene target               | Primer code | Primer pairs used for inactivation (5'-3')                    |
|---------------------------|-------------|---------------------------------------------------------------|
| <i>gcnG1</i>              | G1delF      | GTCTGTTCACCATCTTTCCGGCGACGGCGCACCTGTATattccggggatccgctcgacc   |
|                           | G1delR      | GACCATCTCGTCCCACATGACCAGCGGCATCACCAGCTGttaggctggagctgcttc     |
| <i>gcnG2</i>              | G2delF      | TTCGAGGTGAACGGGATGCTGCTGGAGGGCTGGAGCCGattccggggatccgctcgacc   |
|                           | G2delR      | CAGCGGGAAGTGGTCCGCCAGCTGCGGAAGCACCAACTGttaggctggagctgcttc     |
| <i>gcnG1</i><br><i>G2</i> | G1delF      | GTCTGTTCACCATCTTTCCGGCGACGGCGCACCTGTATattccggggatccgctcgacc   |
|                           | G2delR      | CAGCGGGAAGTGGTCCGCCAGCTGCGGAAGCACCAACTGttaggctggagctgcttc     |
| <i>gcnG3</i>              | G3delF      | ACCACCGATCTGCCGATCCGGCACCTTCATCACCACCGACattccggggatccgctcgacc |
|                           | G3delR      | CTTGGAATGAGGAGTTGCGGTACACGGCGTTCAGACCTgtaggctggagctgcttc      |

**Table S4.** The primers used for PCR confirmation of the double-crossover mutants.

| Gene           | Primer code | Primer pairs designed to verify the mutant strains (5'-3') | Fragment replaced | Length of desired PCR fragments |               |
|----------------|-------------|------------------------------------------------------------|-------------------|---------------------------------|---------------|
|                |             |                                                            |                   | Wild strain                     | Mutant strain |
| <i>gcnG1</i>   | G1tF        | CTTCGCAGCCCTCAATCTCCA                                      | 999               | 1449                            | 1819          |
|                | G1tR        | GTACGAGCTGCTTGTGCATCT                                      |                   |                                 |               |
| <i>gcnG2</i>   | G2tF        | ACCCATTTCTTCCGTTGGTG                                       | 717               | 1035                            | 1687          |
|                | G2tR        | GTCGGACAGCAGCTCGTCCAG                                      |                   |                                 |               |
| <i>gcnG1G2</i> | G1tF        | CTTCGCAGCCCTCAATCTCCA                                      | 2201              | 2668                            | 1836          |
|                | G2tR        | GTCGGACAGCAGCTCGTCCAG                                      |                   |                                 |               |
| <i>gcnG3</i>   | G3tF        | ATGGTCCCGTACATCACGTCG                                      | 687               | 1044                            | 1726          |
|                | G3tR        | TCCTCTCGGTTTCGTGTCGTCT                                     |                   |                                 |               |

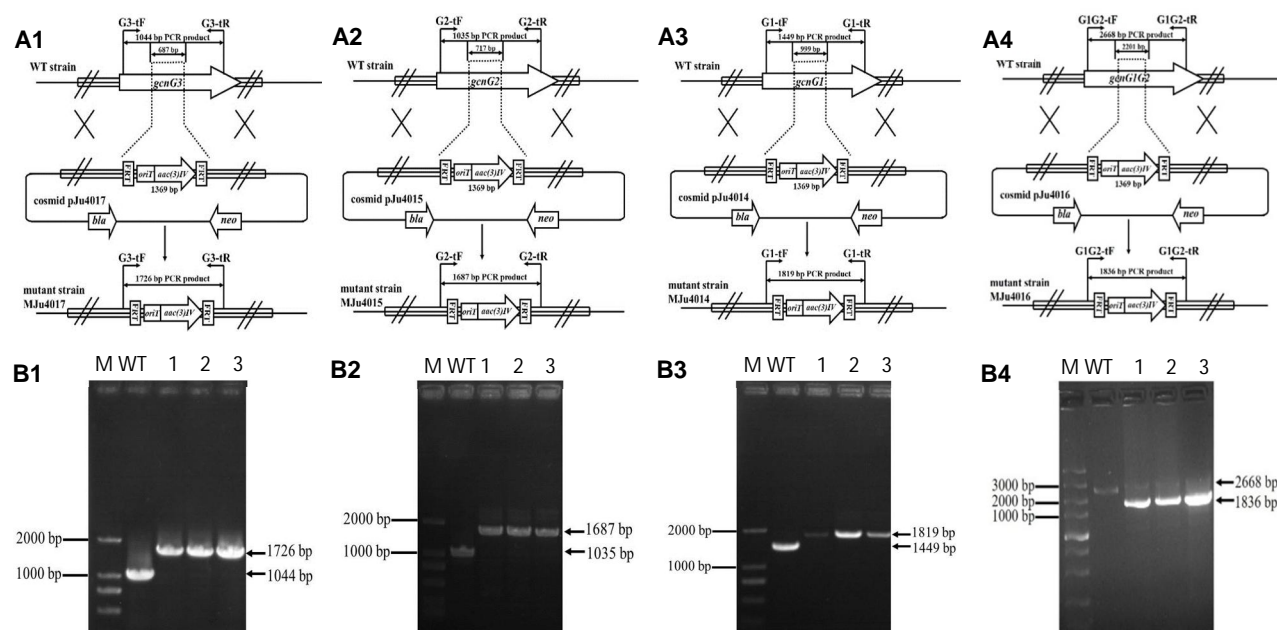

**Figure S1.** Gene inactivation of *gcnG3~gcnG1*, and *gcnG1G2*. A1~A4: construction of  $\Delta gcnG3$ ,  $\Delta gcnG2$ ,  $\Delta gcnG1$ , and  $\Delta gcnG1G2$  mutants; B1~B4: gel electrophoresis of PCR products, DNA templates were from DNA marker DL 2000 (Takara, lane M), *Streptomyces lusitanus* SCSIO LR32 (lane WT), and  $\Delta gcnG3$ ,  $\Delta gcnG2$ ,  $\Delta gcnG1$ , and  $\Delta gcnG1G2$  mutant strains (lanes 1, 2, 3), respectively.

**Figure S2.** Procedure for isolation of compound from the mutant  $\Delta gcnG3$ .

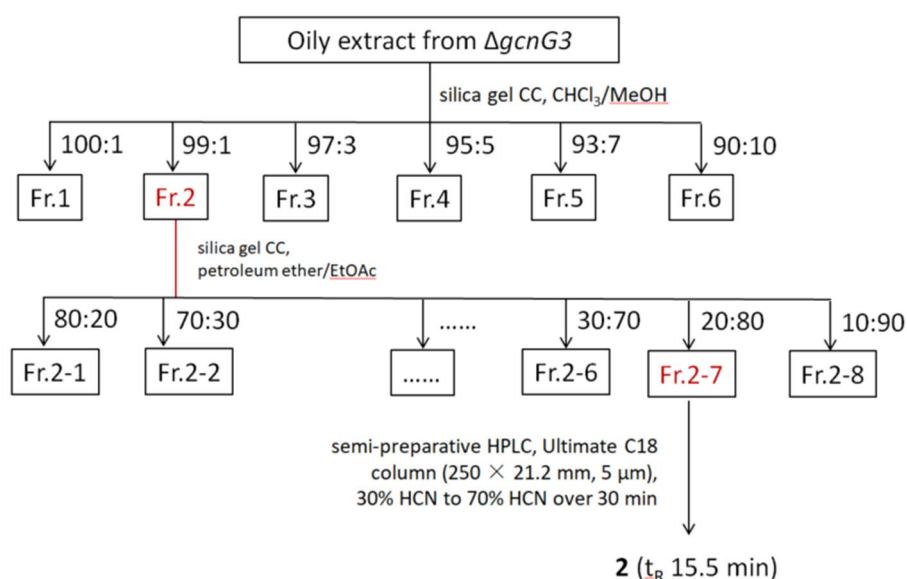

**Figure S3.** Procedure for isolation of compounds from the mutant  $\Delta gcnG2$ .

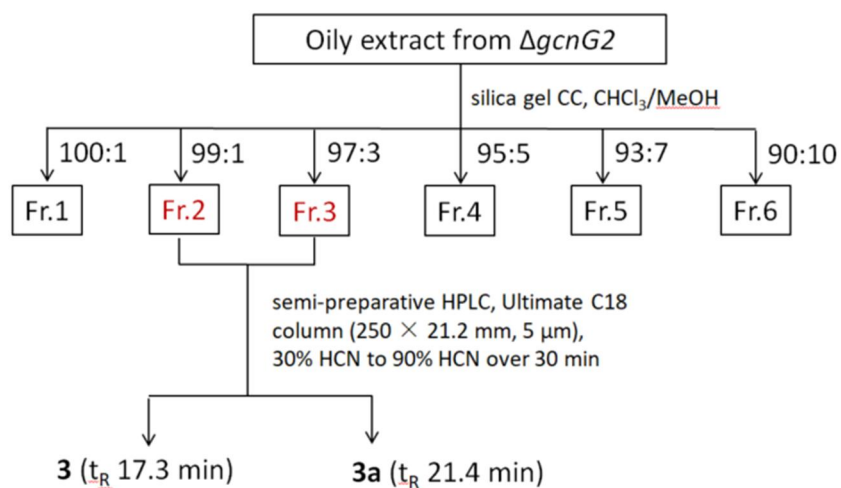

**Figure S4.** Procedure for isolation of compound from the mutant  $\Delta gcnG1$ .

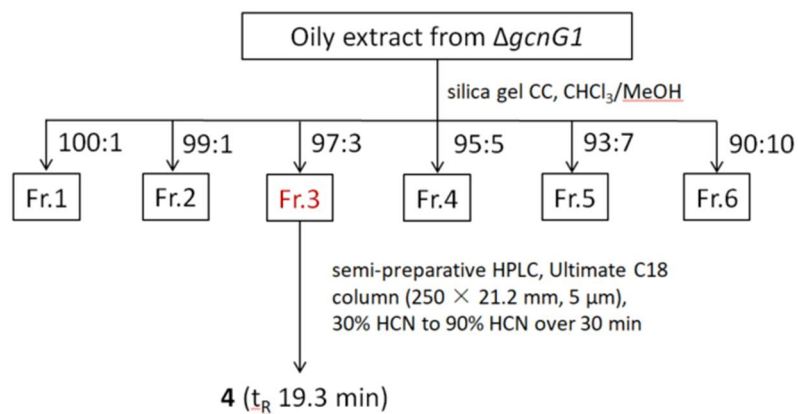

**Figure S5.** Procedure for isolation of compound from the mutant  $\Delta gcnG1G2$ .

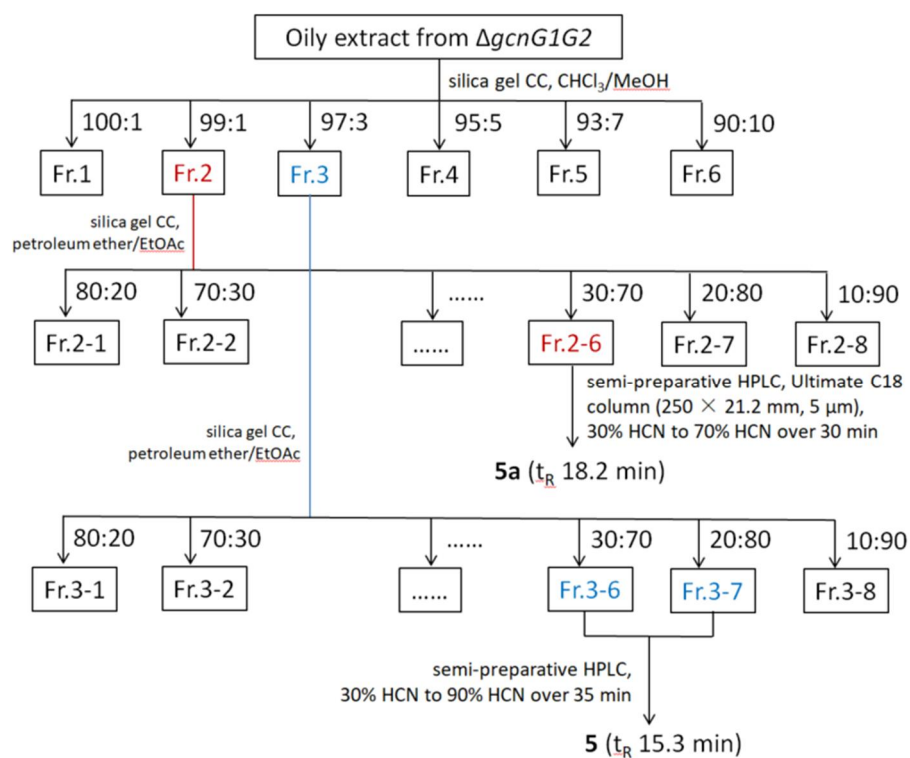

**Figure S6.** The UV spectrum of grincamycin U (**3a**).

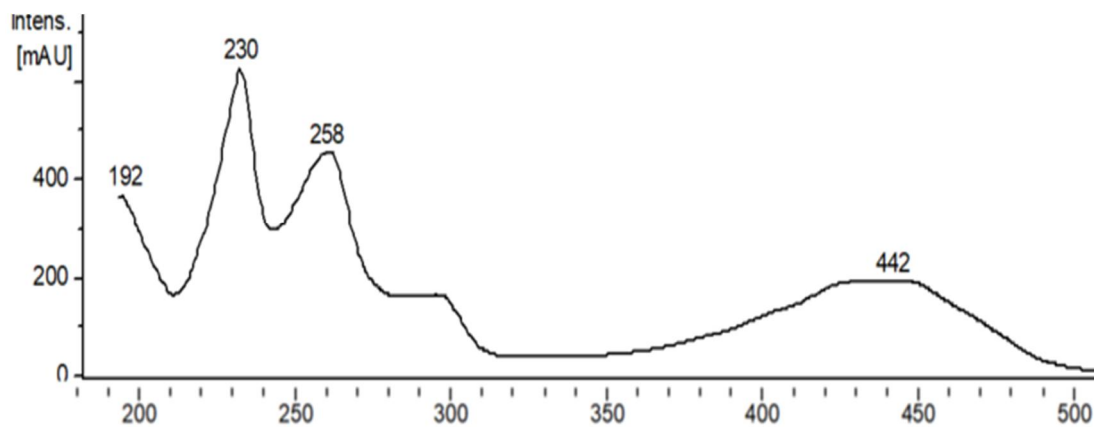

**Figure S7.** The (-)HR-ESI-MS spectrum of grincamycin U (**3a**).

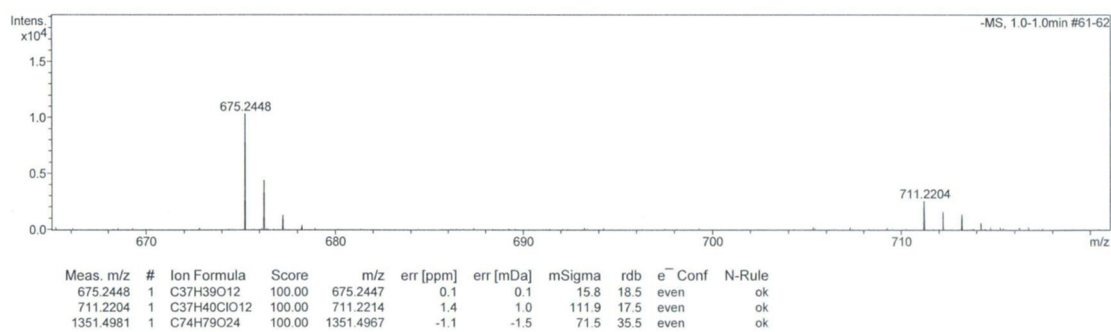

**Figure S8.** The  $^1\text{H}$  NMR (700 MHz) spectrum of grincamycin U (**3a**) in  $\text{CD}_3\text{OD}$ .

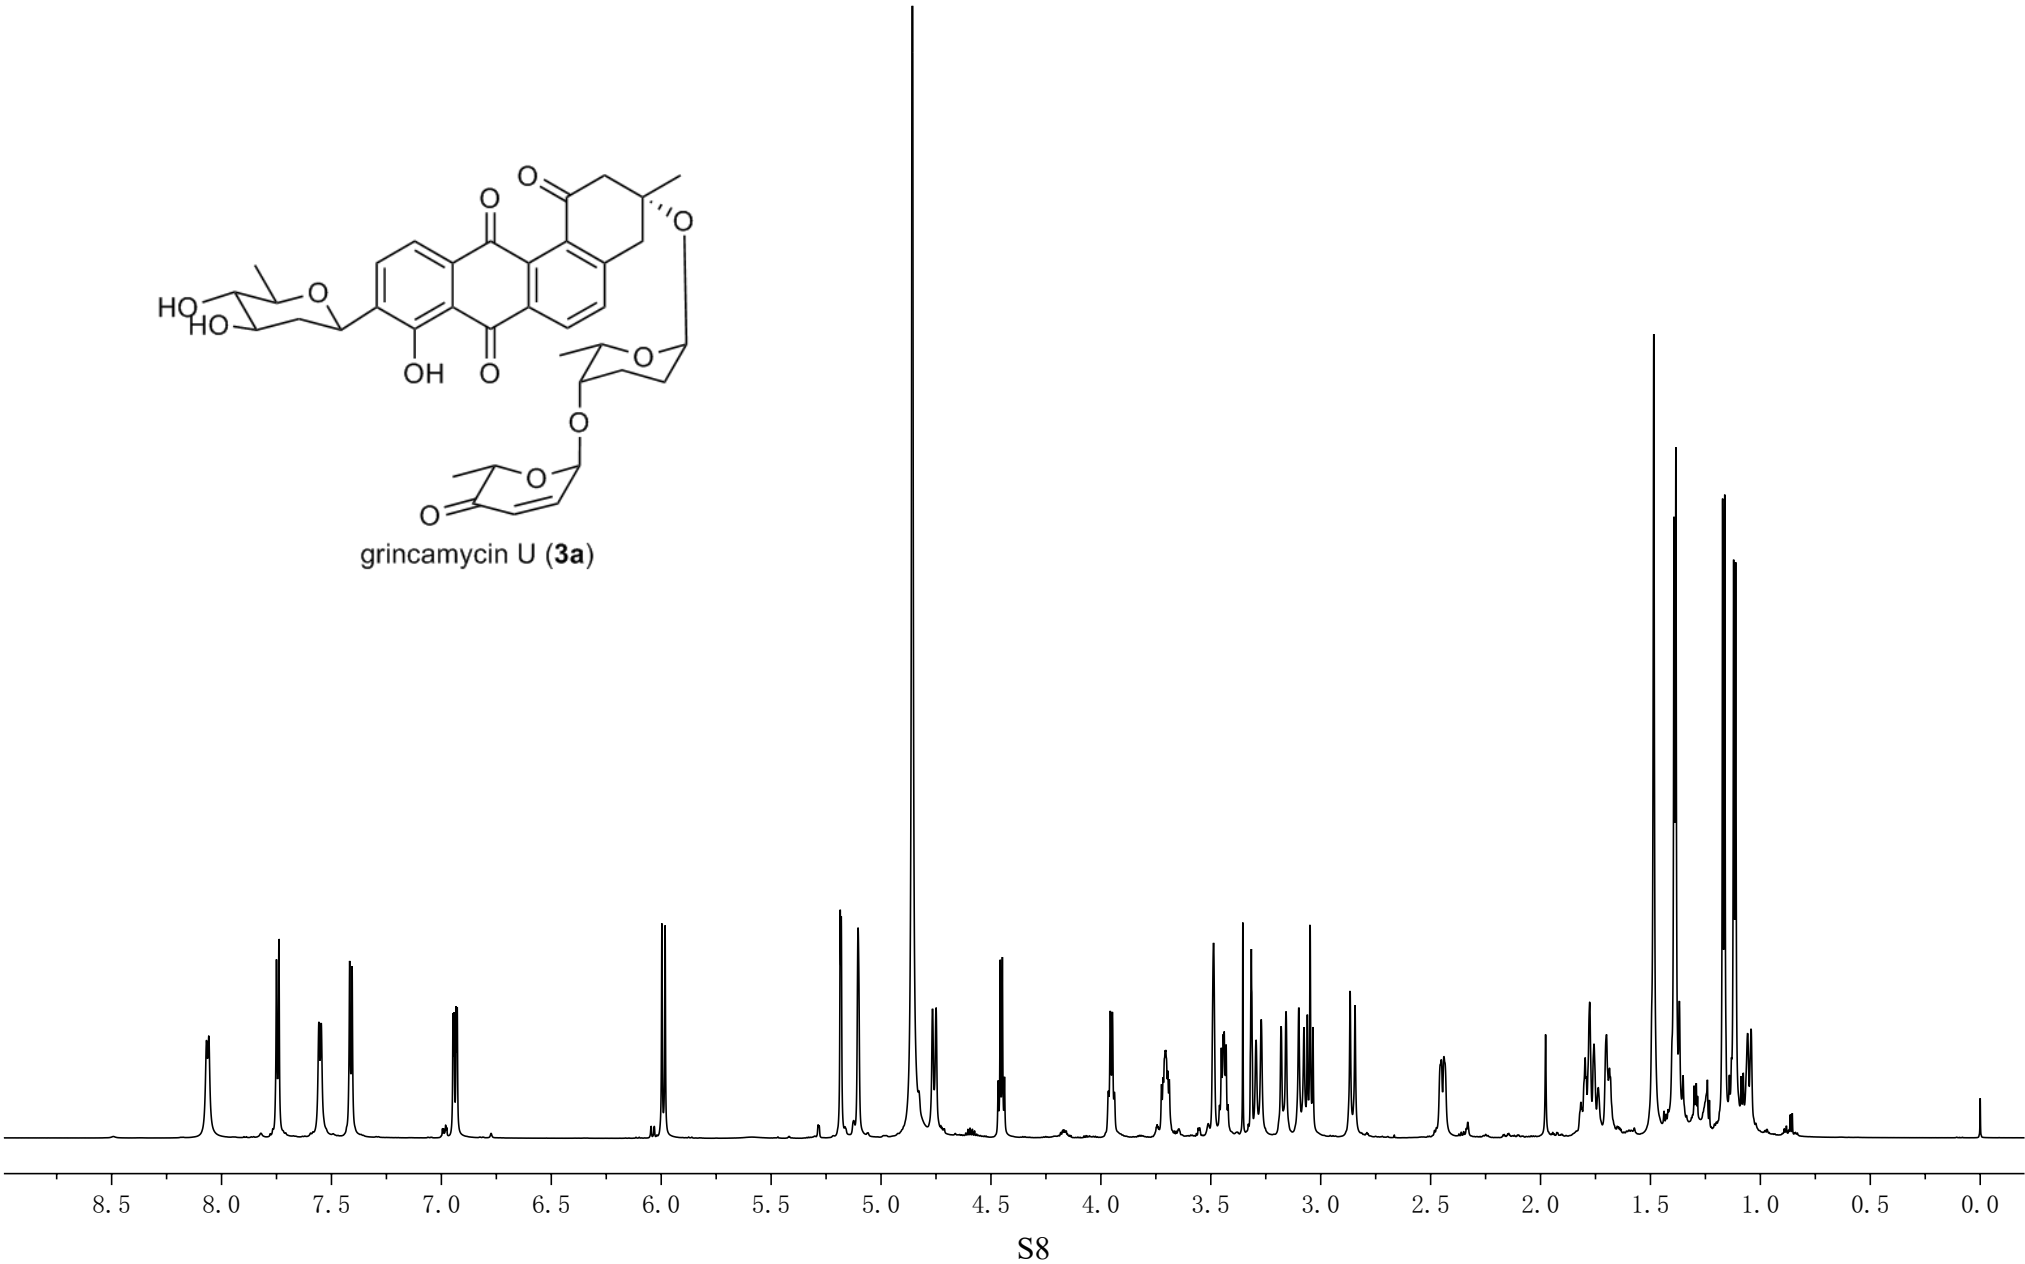

**Figure S9.** The  $^{13}\text{C}$  NMR (175 MHz) spectrum of grincamycin U (**3a**) in  $\text{CD}_3\text{OD}$ .

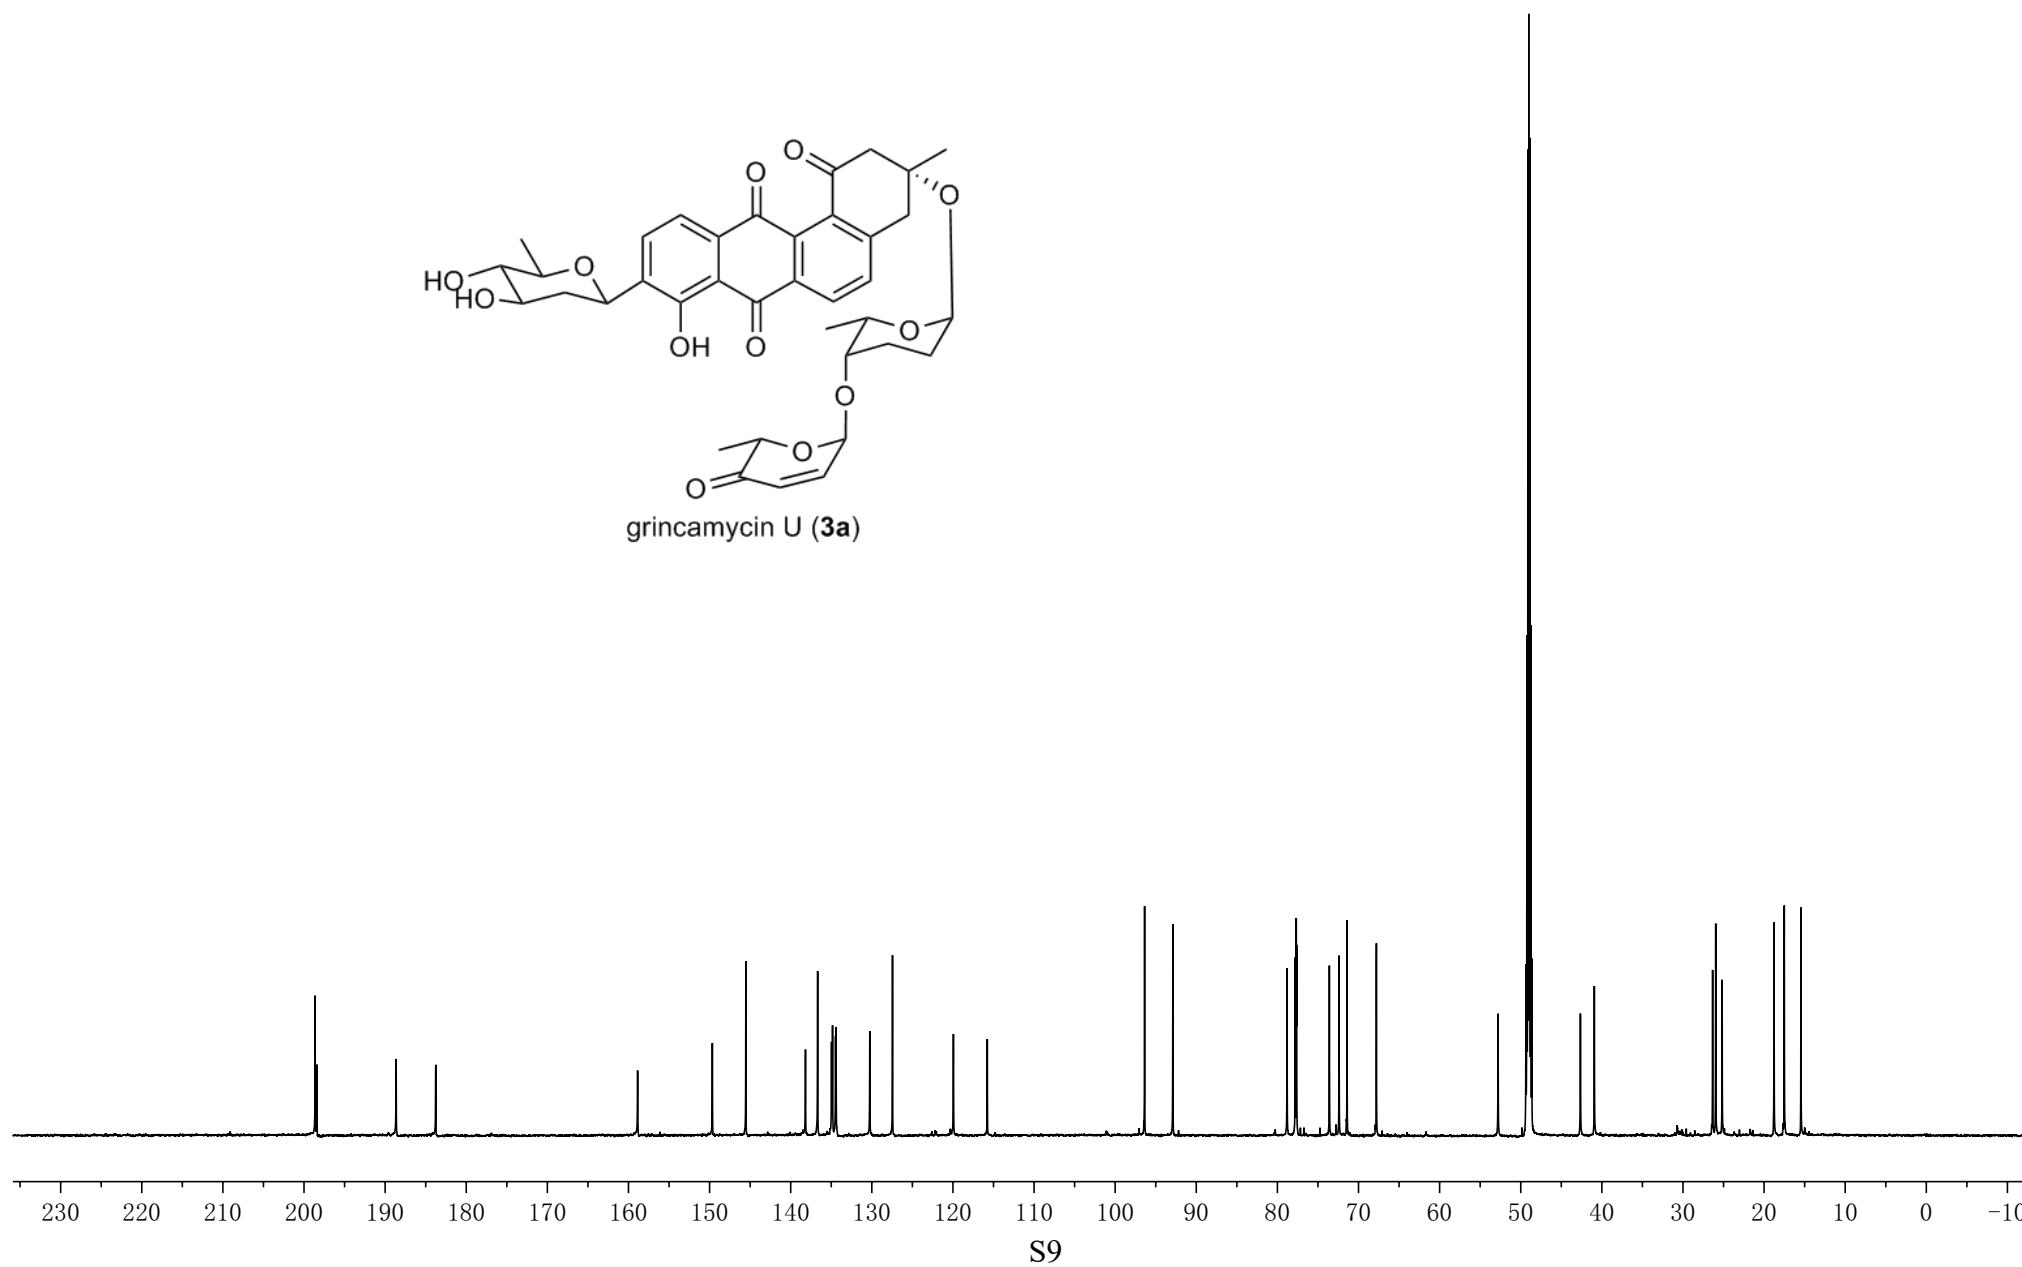

**Figure S10.** The DEPT-135 NMR (175 MHz) spectrum of grincamycin U (**3a**) in CD<sub>3</sub>OD.

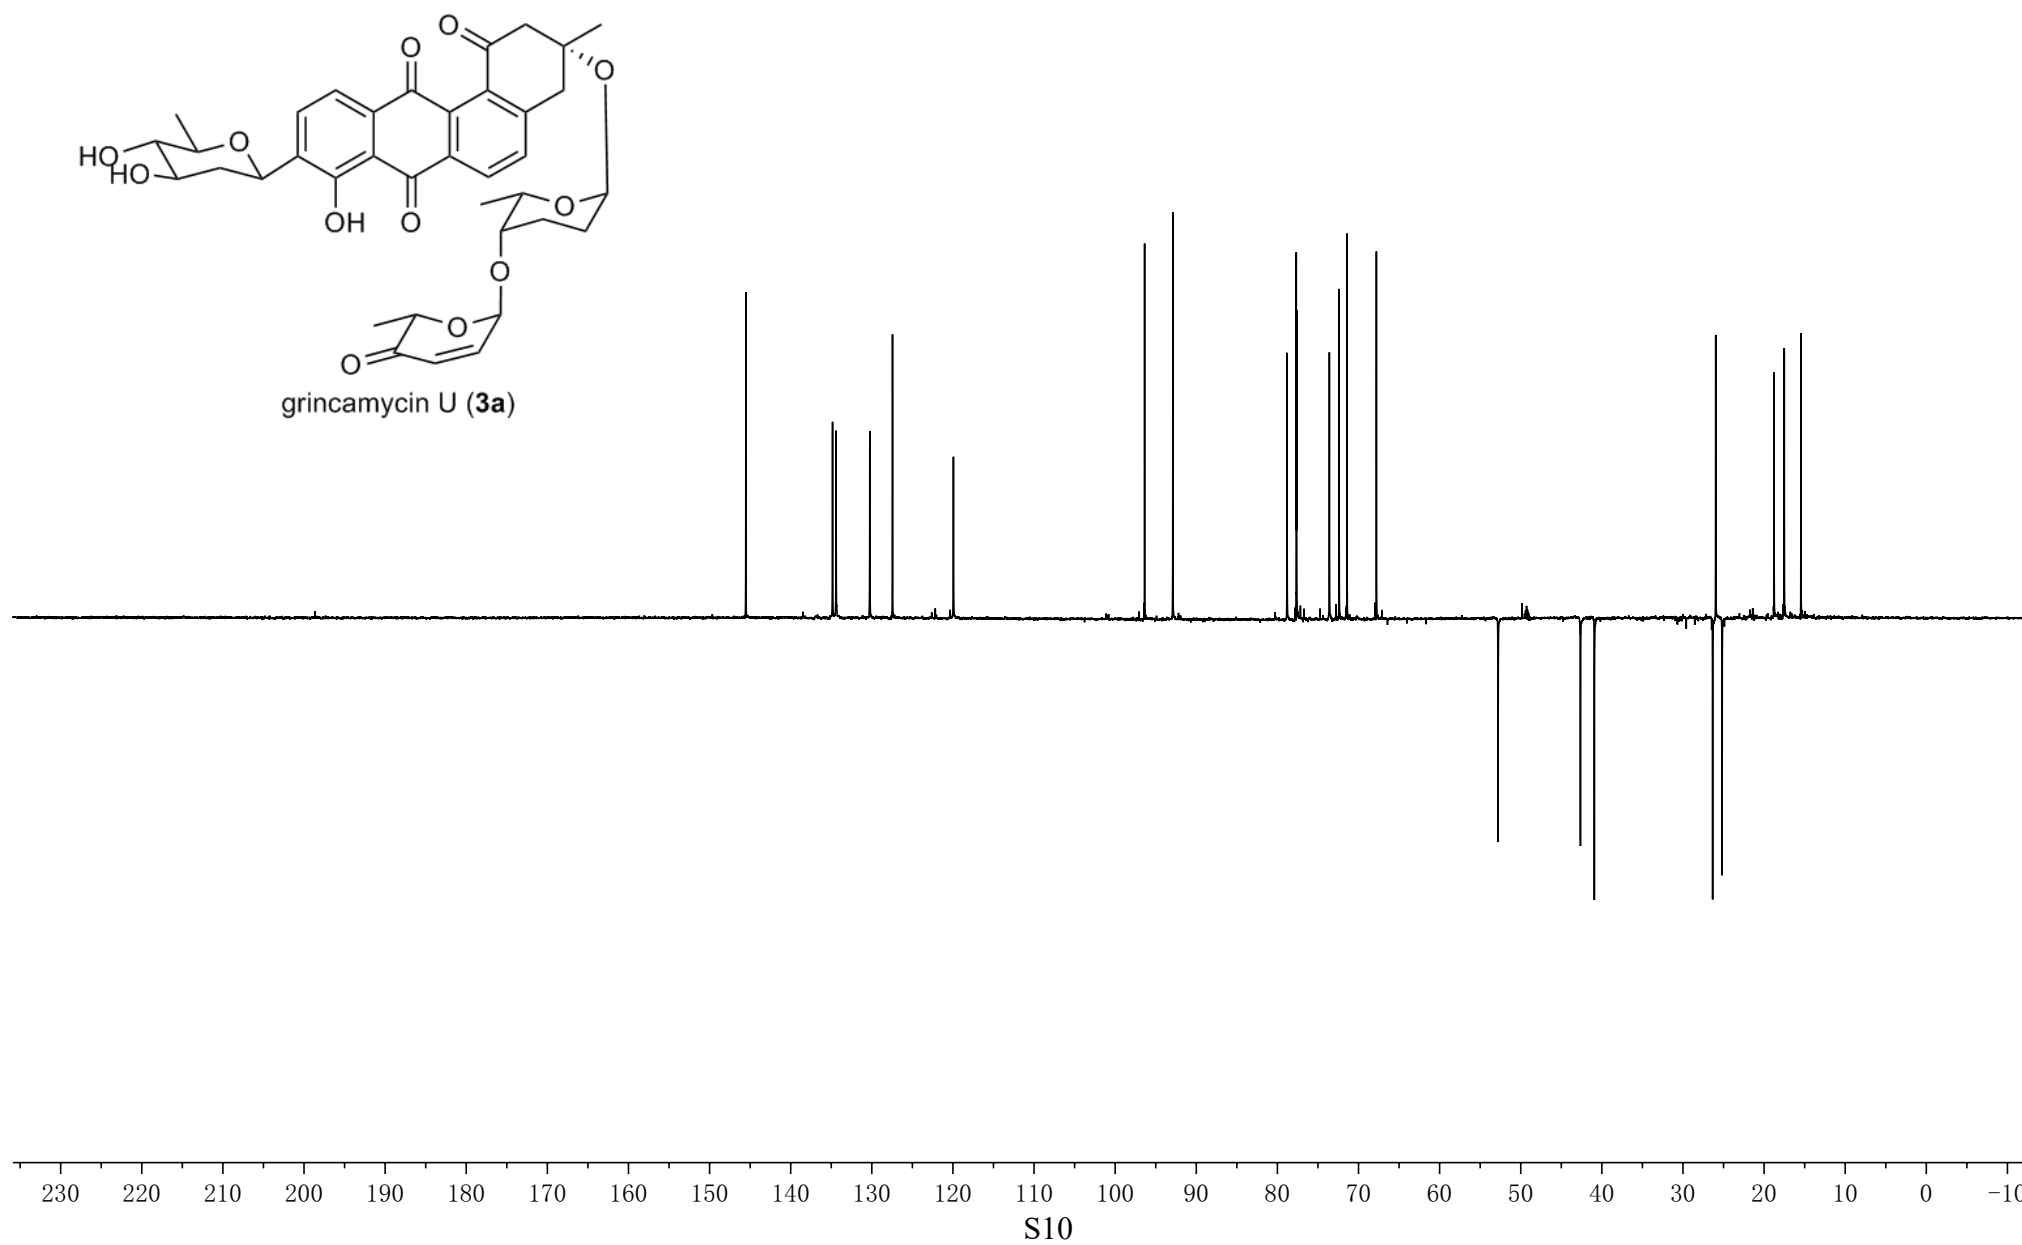

**Figure S11.** The COSY NMR spectrum of grincamycin U (**3a**) in CD<sub>3</sub>OD.

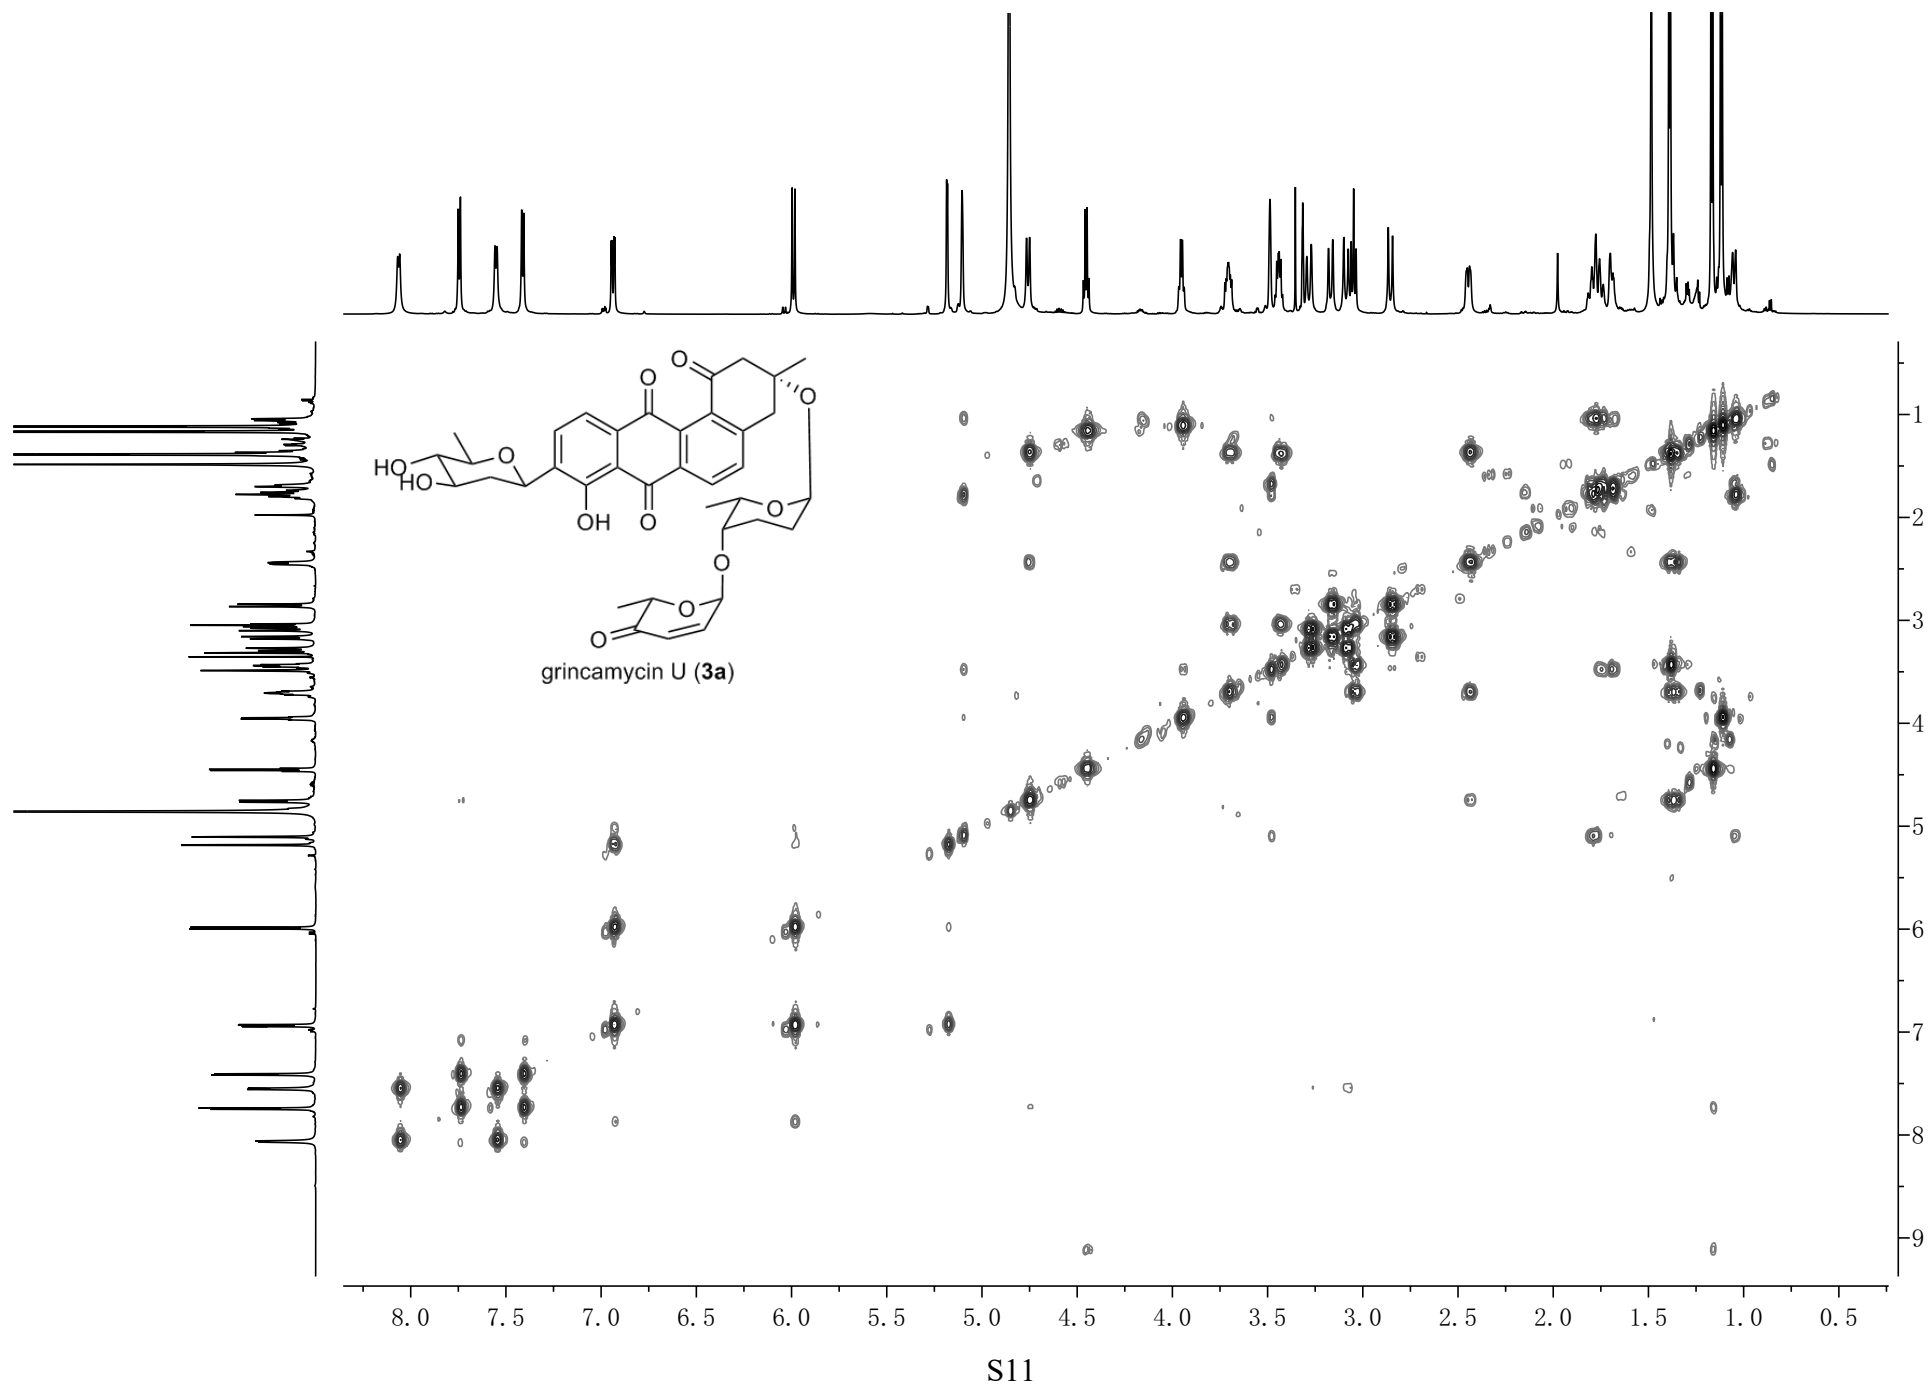

**Figure S12.** The HMQC NMR spectrum of grincamycin U (**3a**) in CD<sub>3</sub>OD.

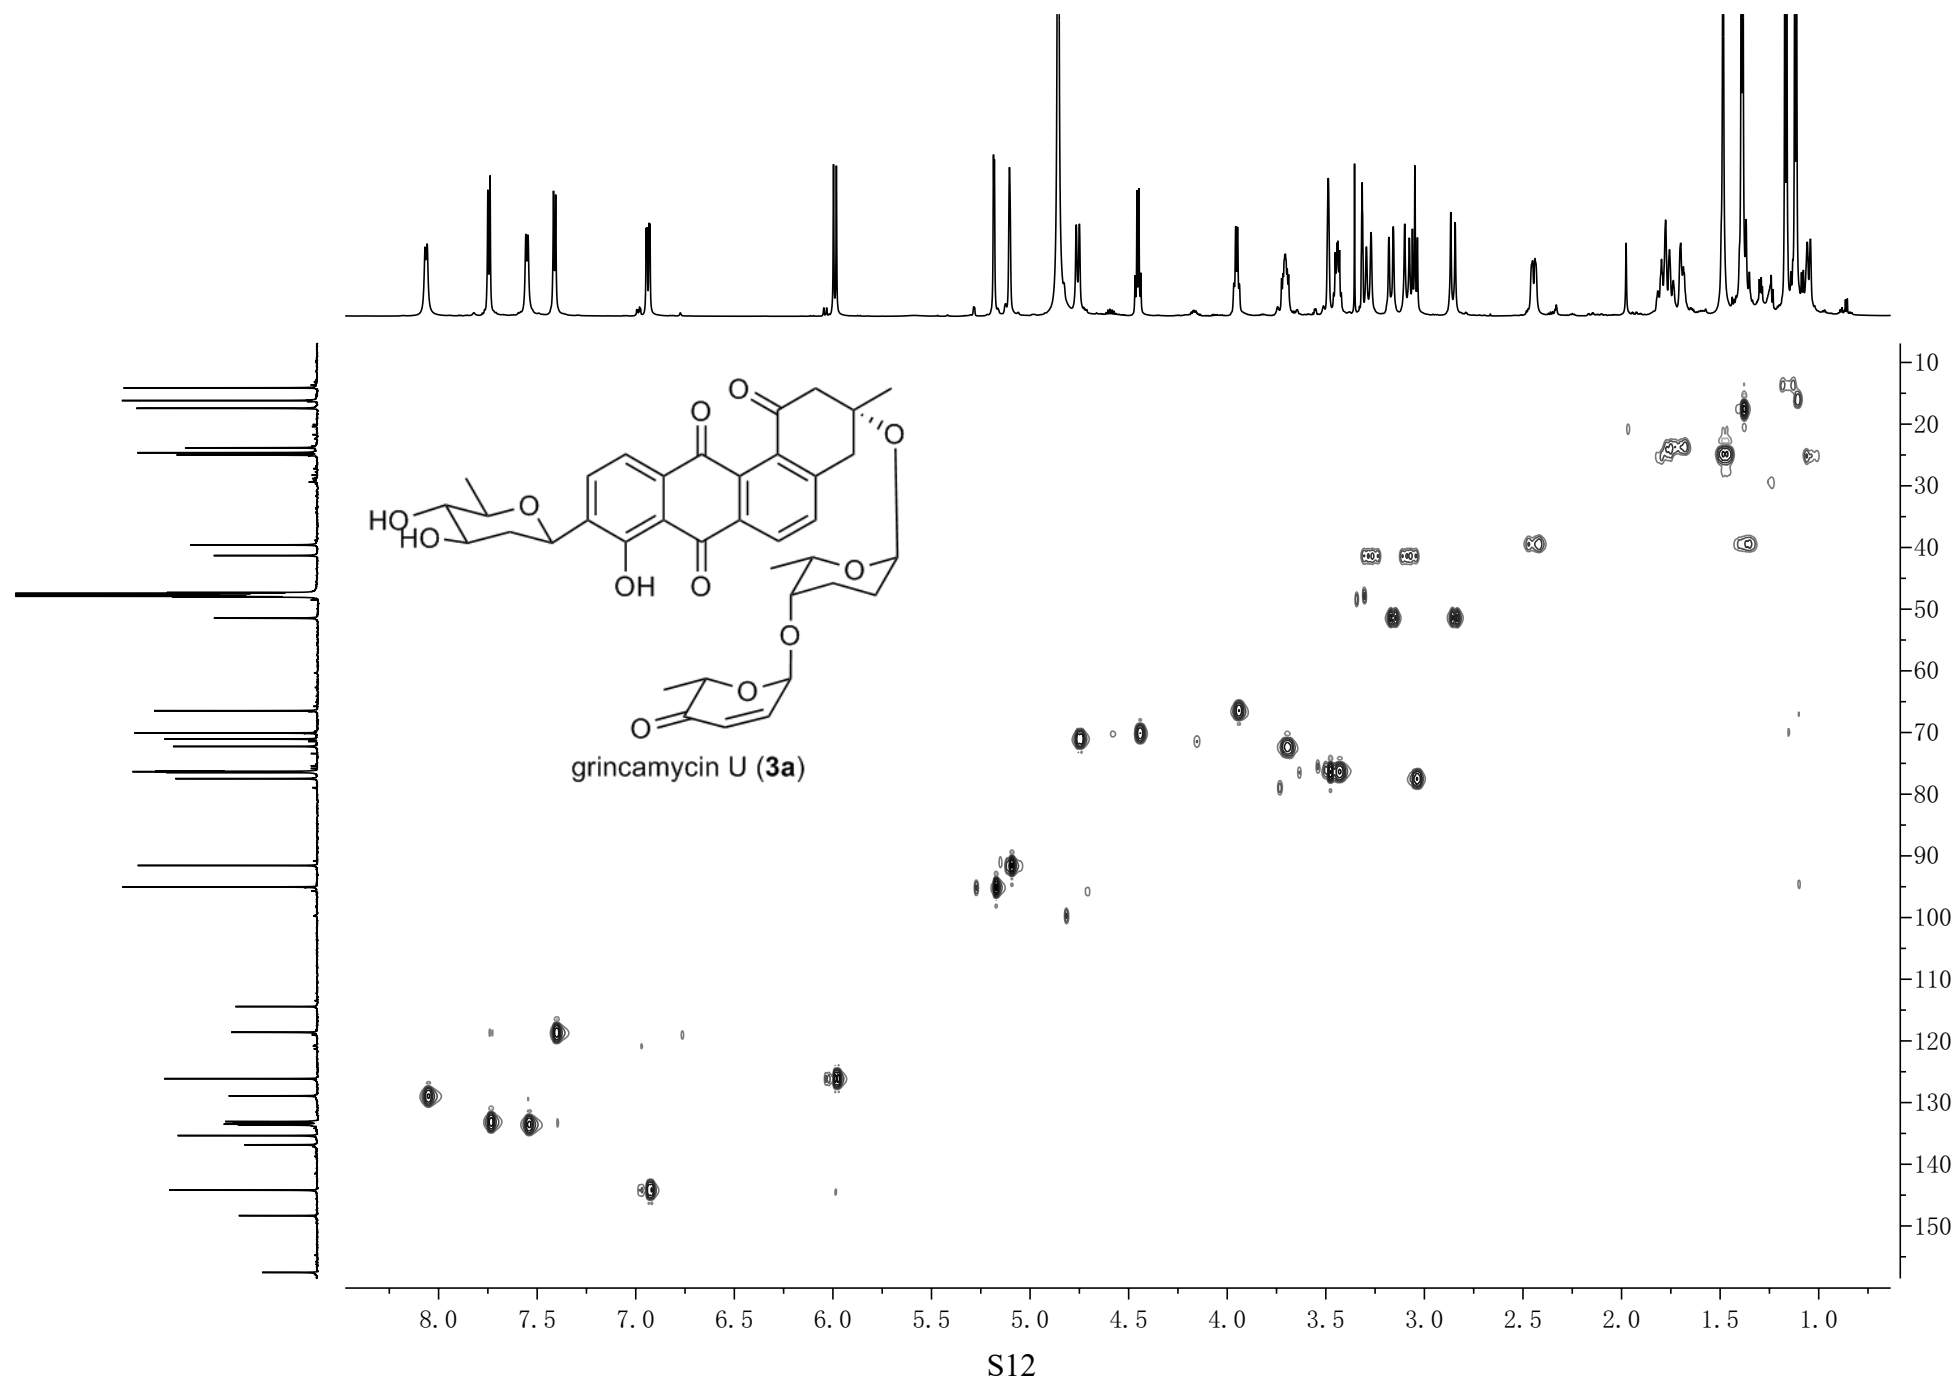

**Figure S13.** The HMBC NMR spectrum of grincamycin U (**3a**) in CD<sub>3</sub>OD.

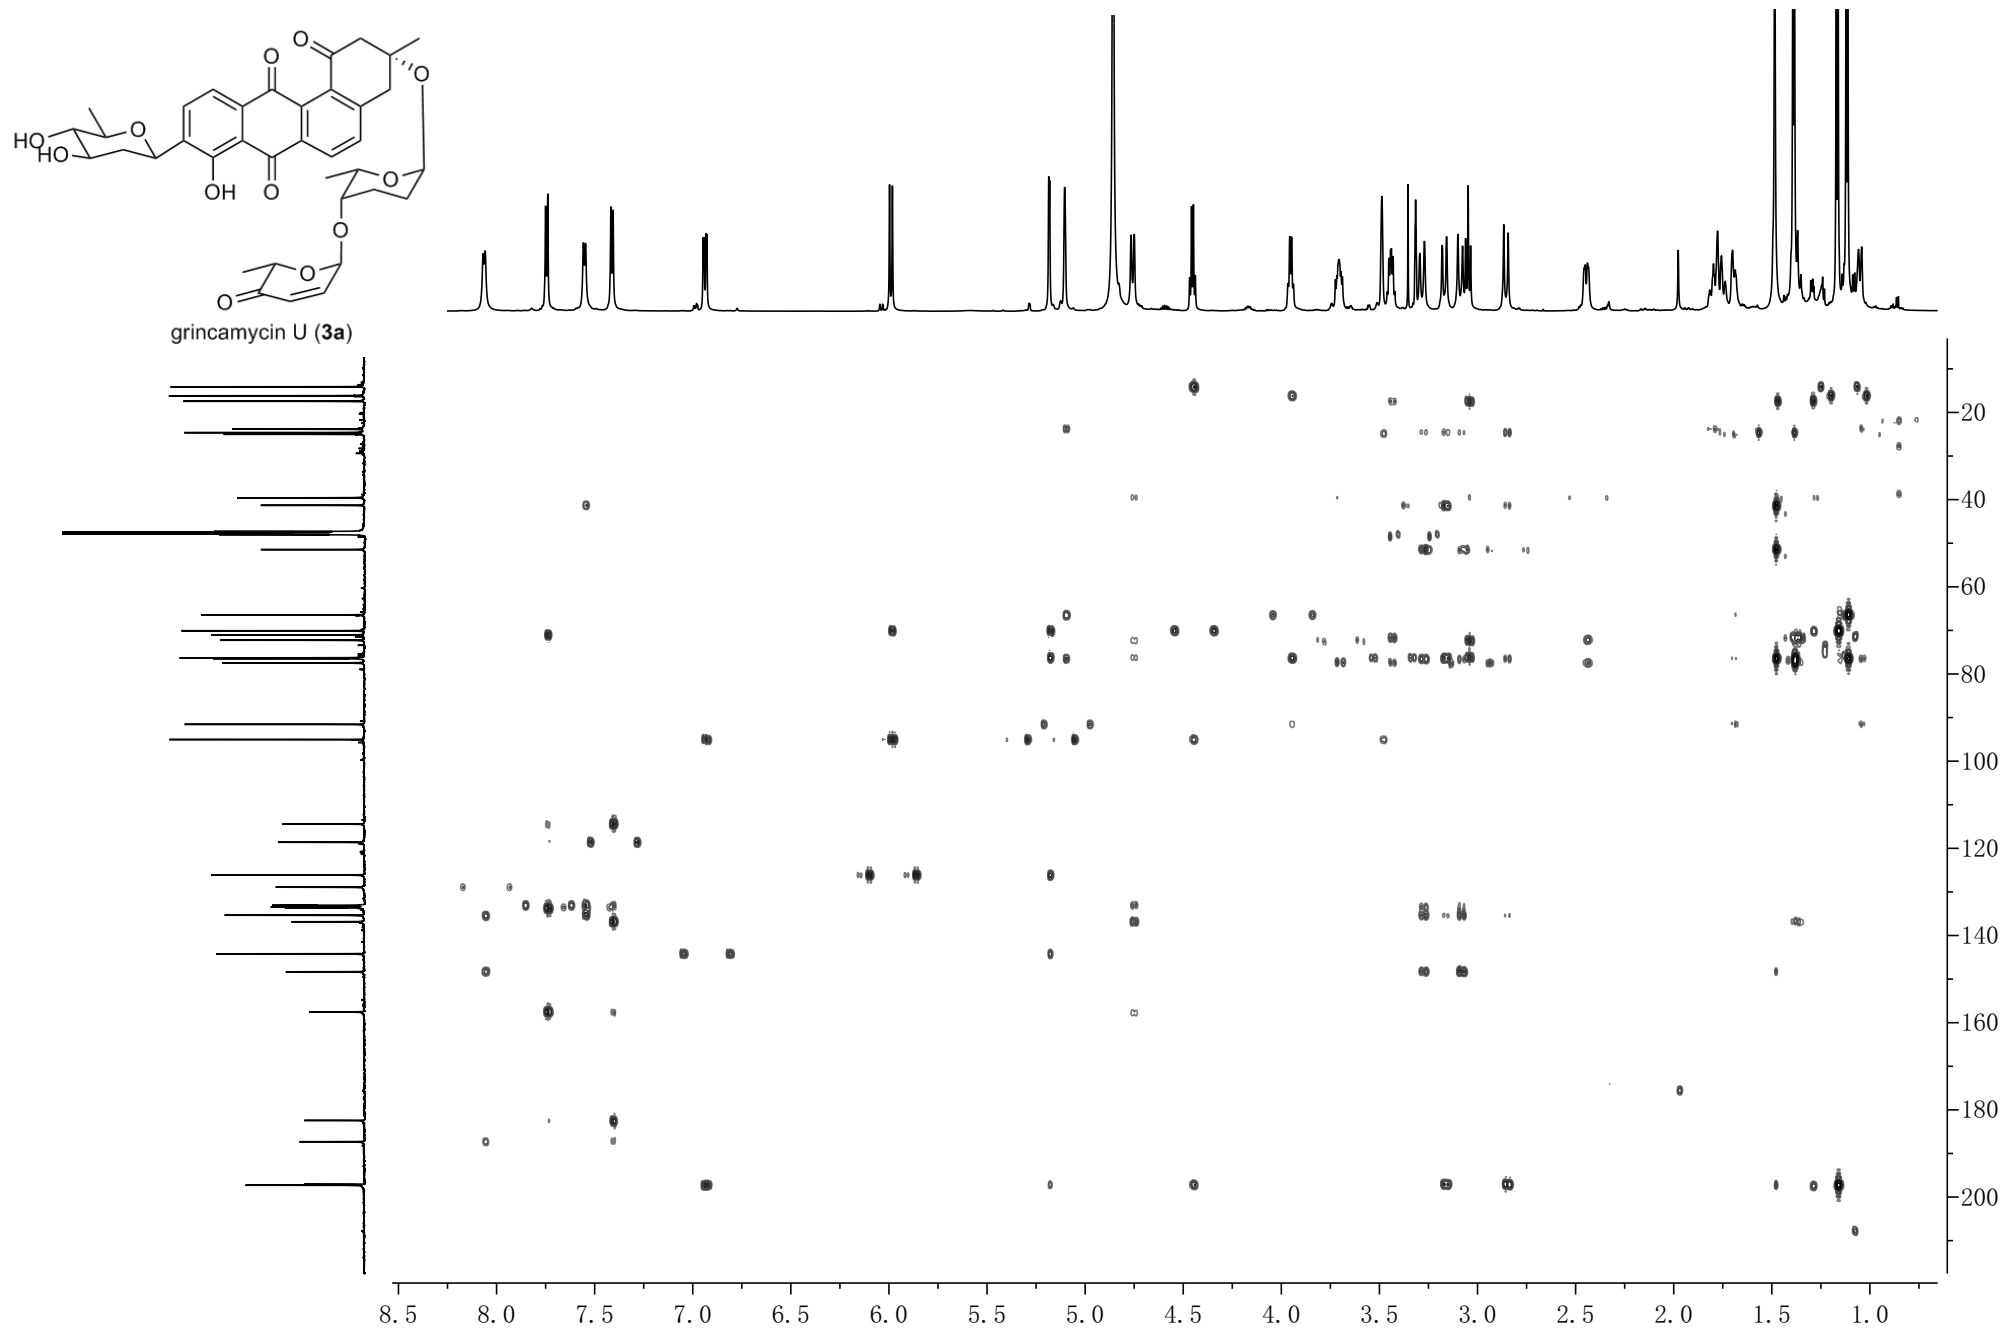

**Figure S14.** The NOESY NMR spectrum of grincamycin U (**3a**) in CD<sub>3</sub>OD.

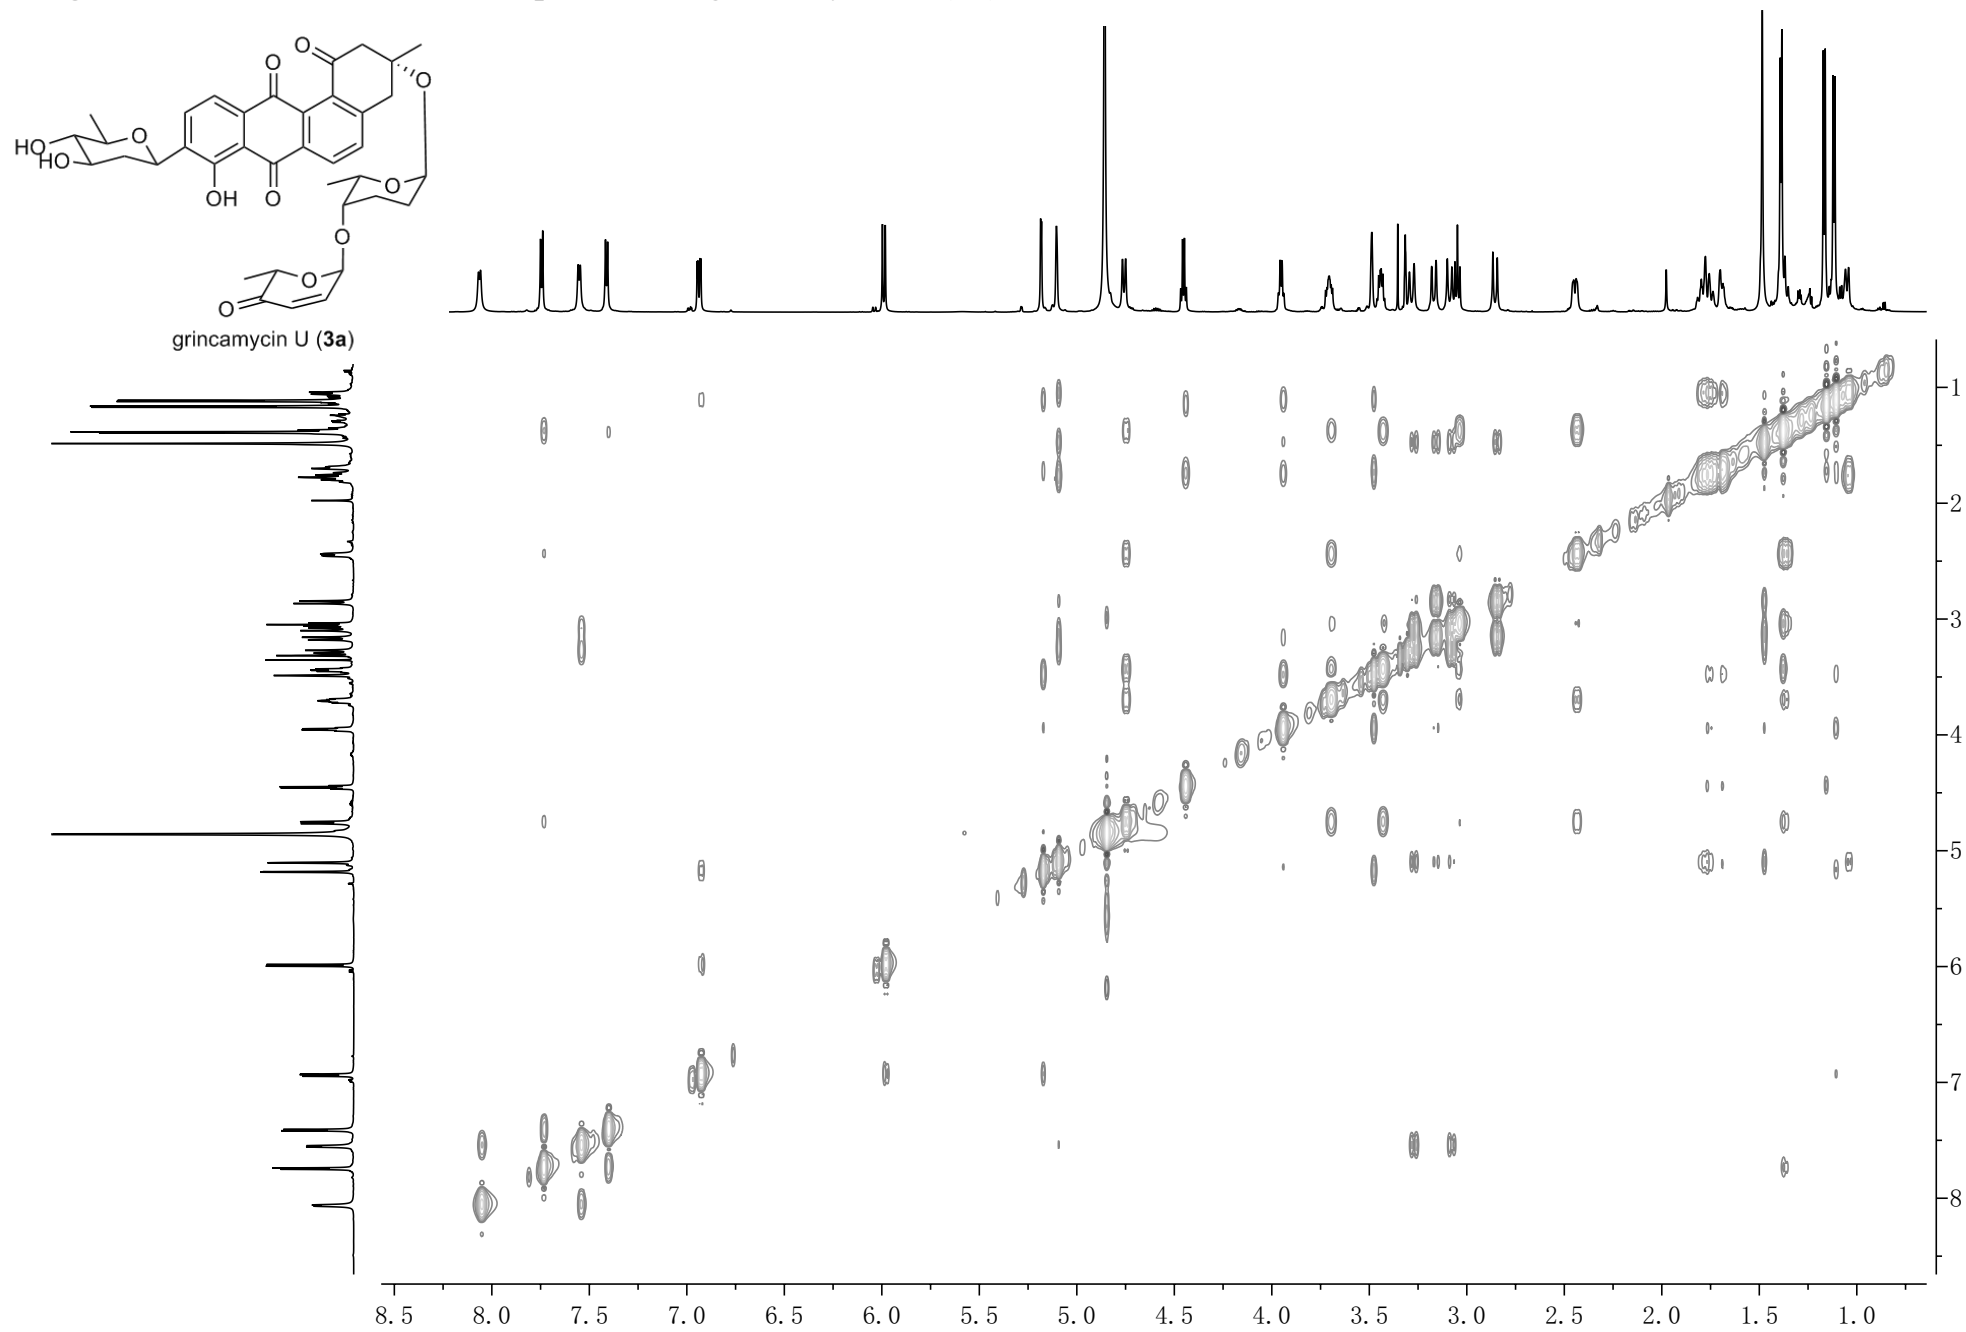

**Figure S15.** The UV spectrum of grincamycin V (**3'**).

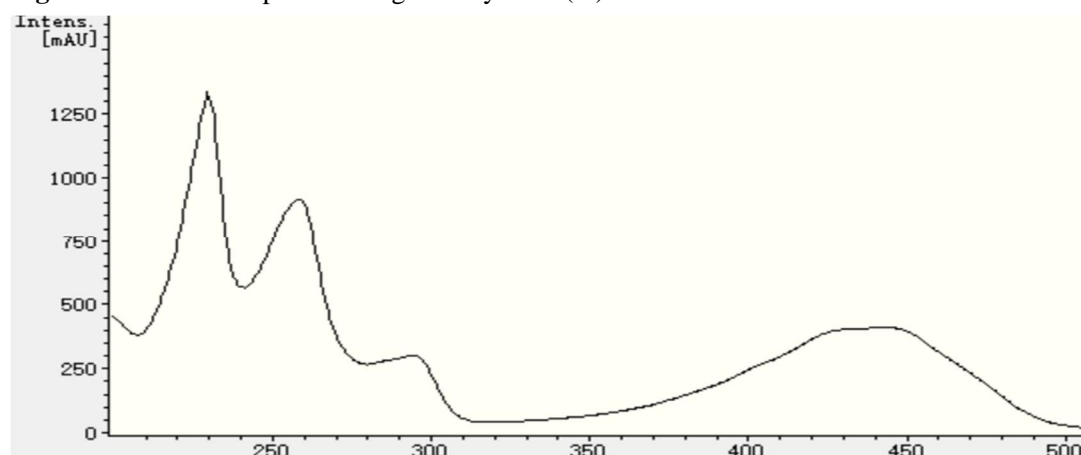

**Figure S16.** The (-)HR-ESI-MS spectrum of grincamycin V (**3'**).

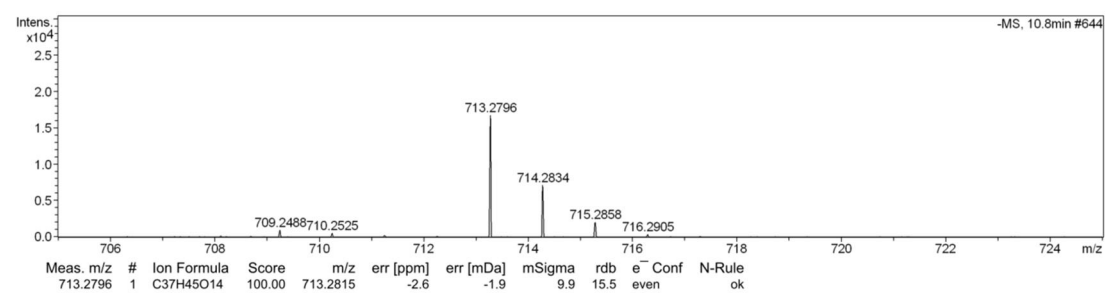

**Figure S17.** The  $^1\text{H}$  NMR (700 MHz) spectrum of grincamycin V (**3'**) in  $\text{CD}_3\text{OD}$ .

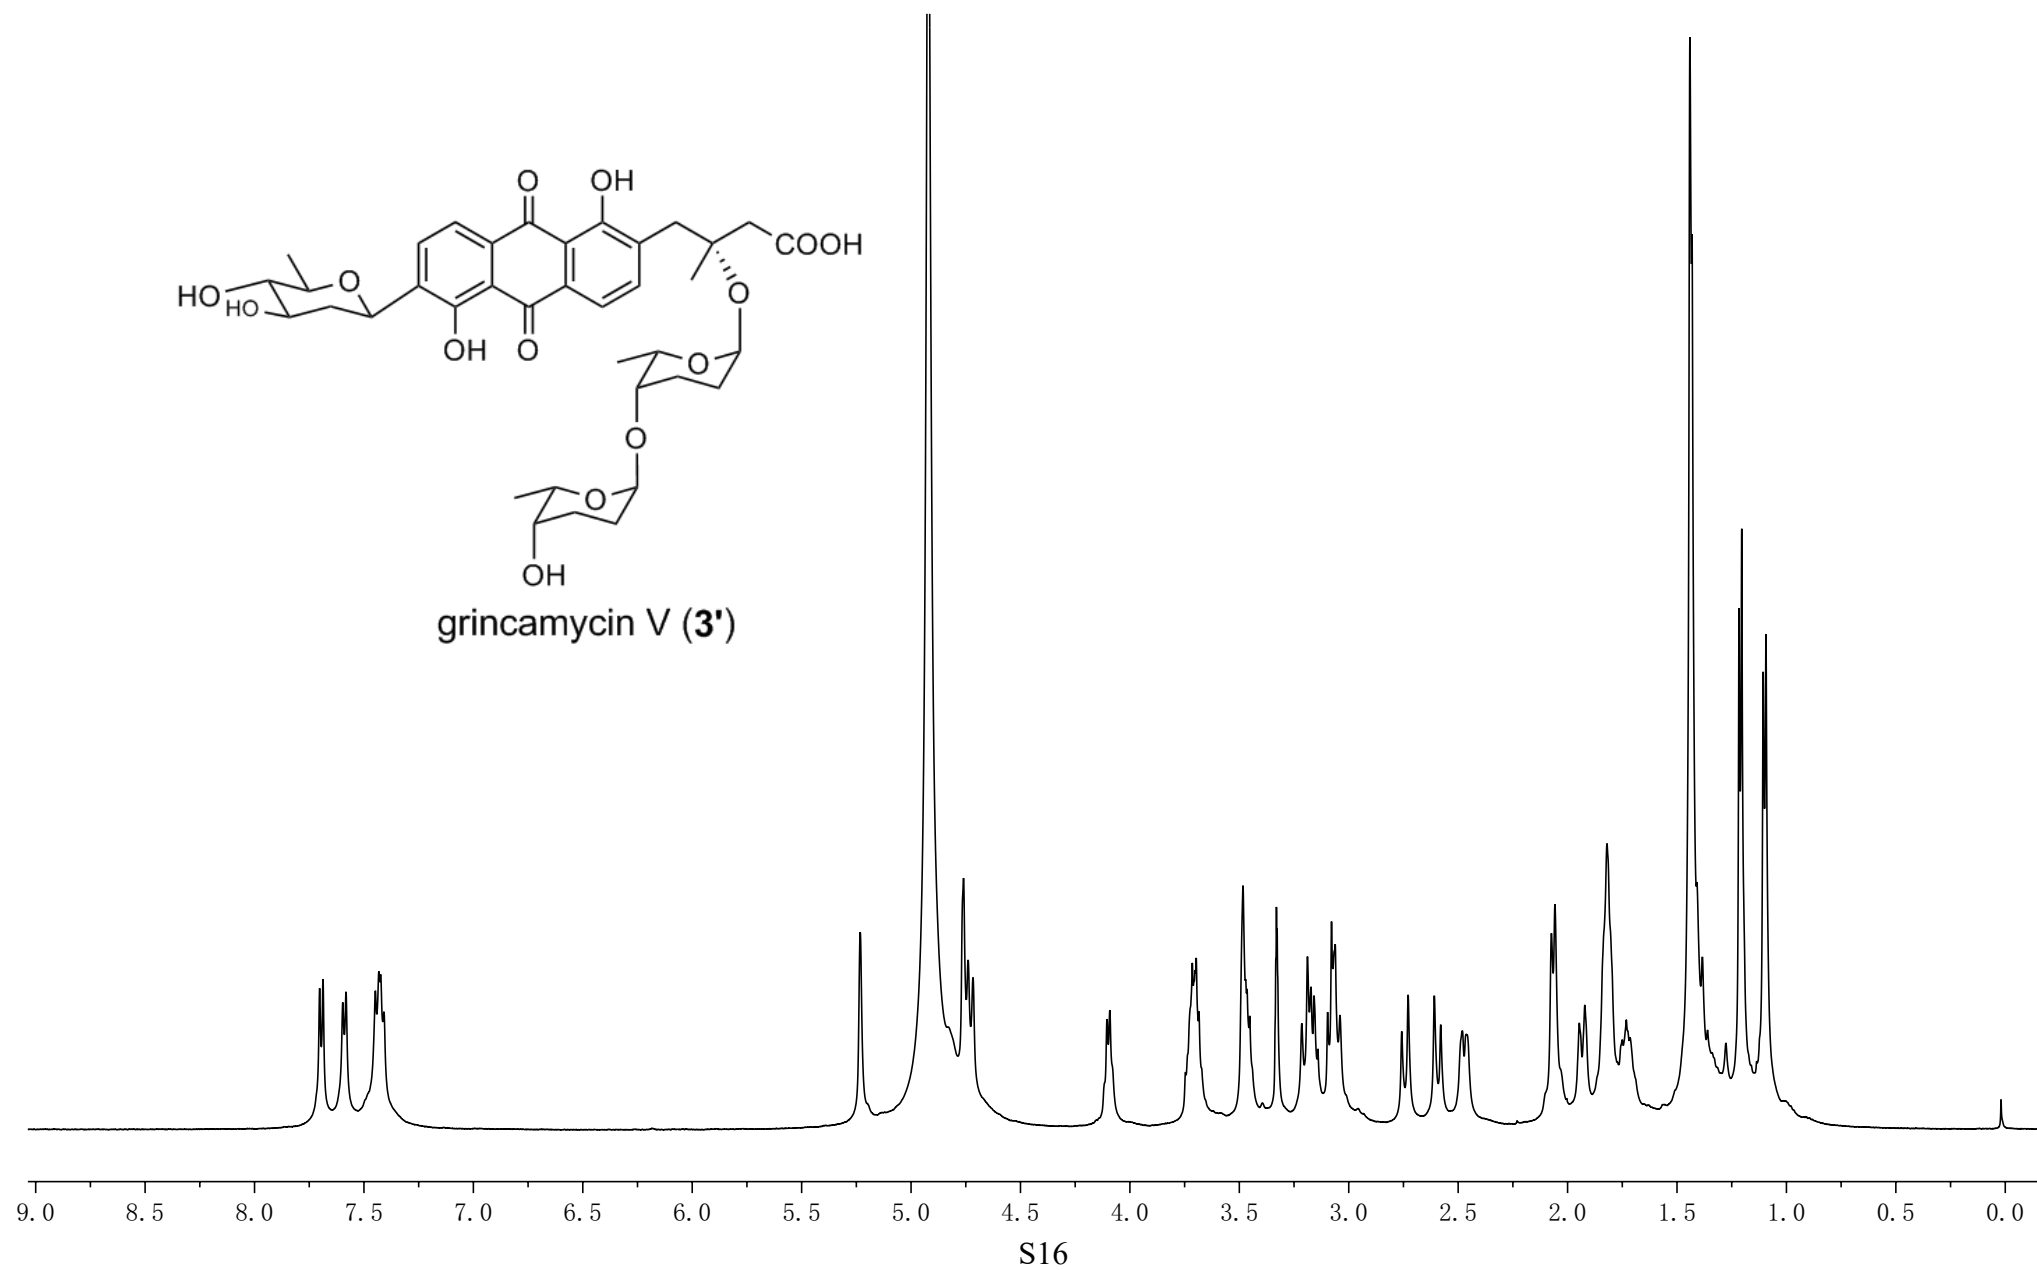

**Figure S18.** The  $^{13}\text{C}$  NMR (175 MHz) spectrum of grincamycin V (**3'**) in  $\text{CD}_3\text{OD}$ .

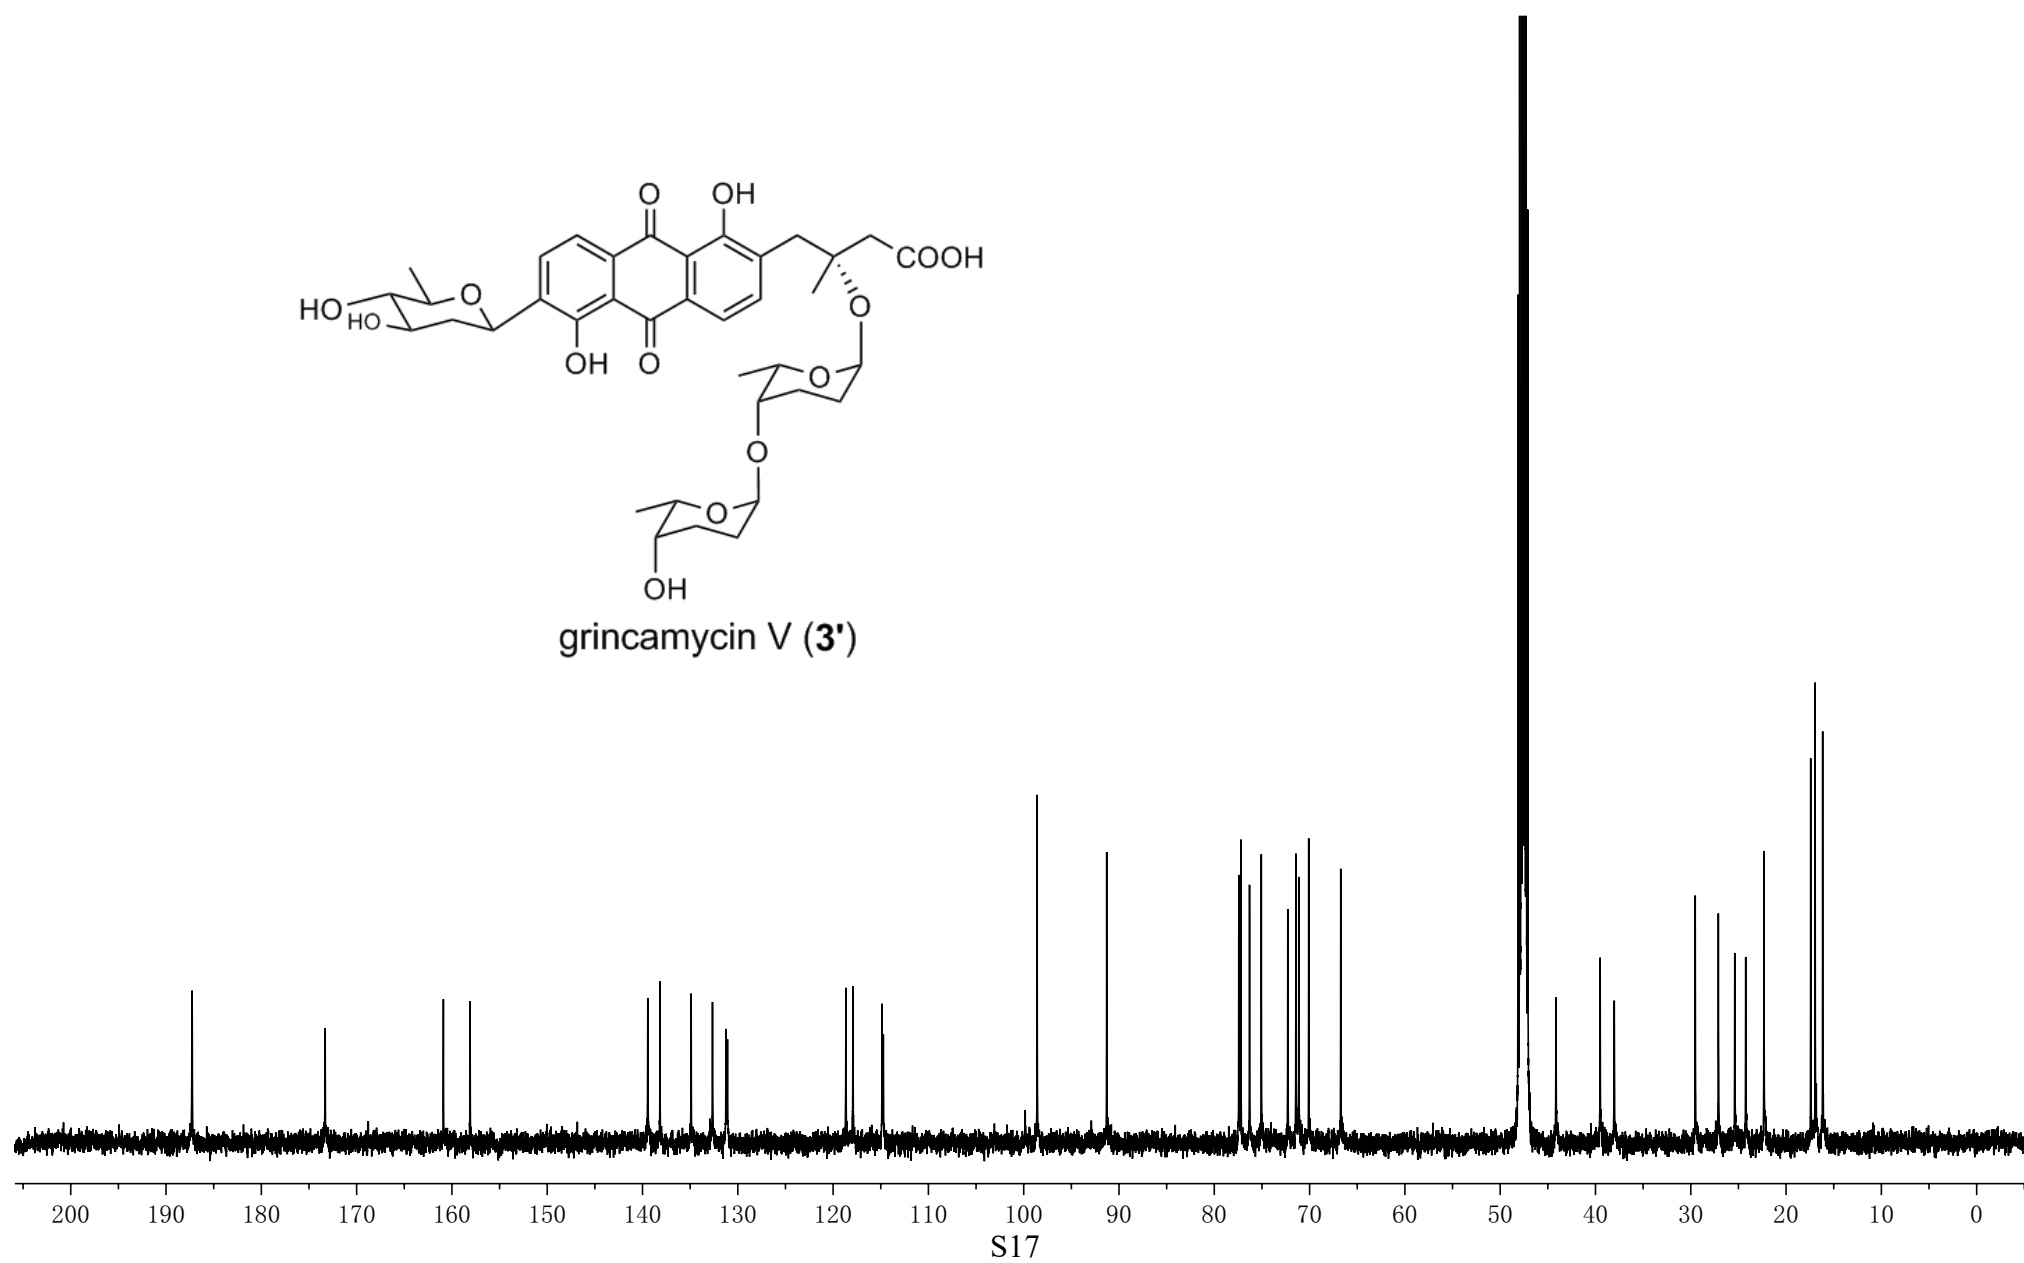

**Figure S19.** The DEPT-135 NMR spectrum of grincamycin V (**3'**) in CD<sub>3</sub>OD.

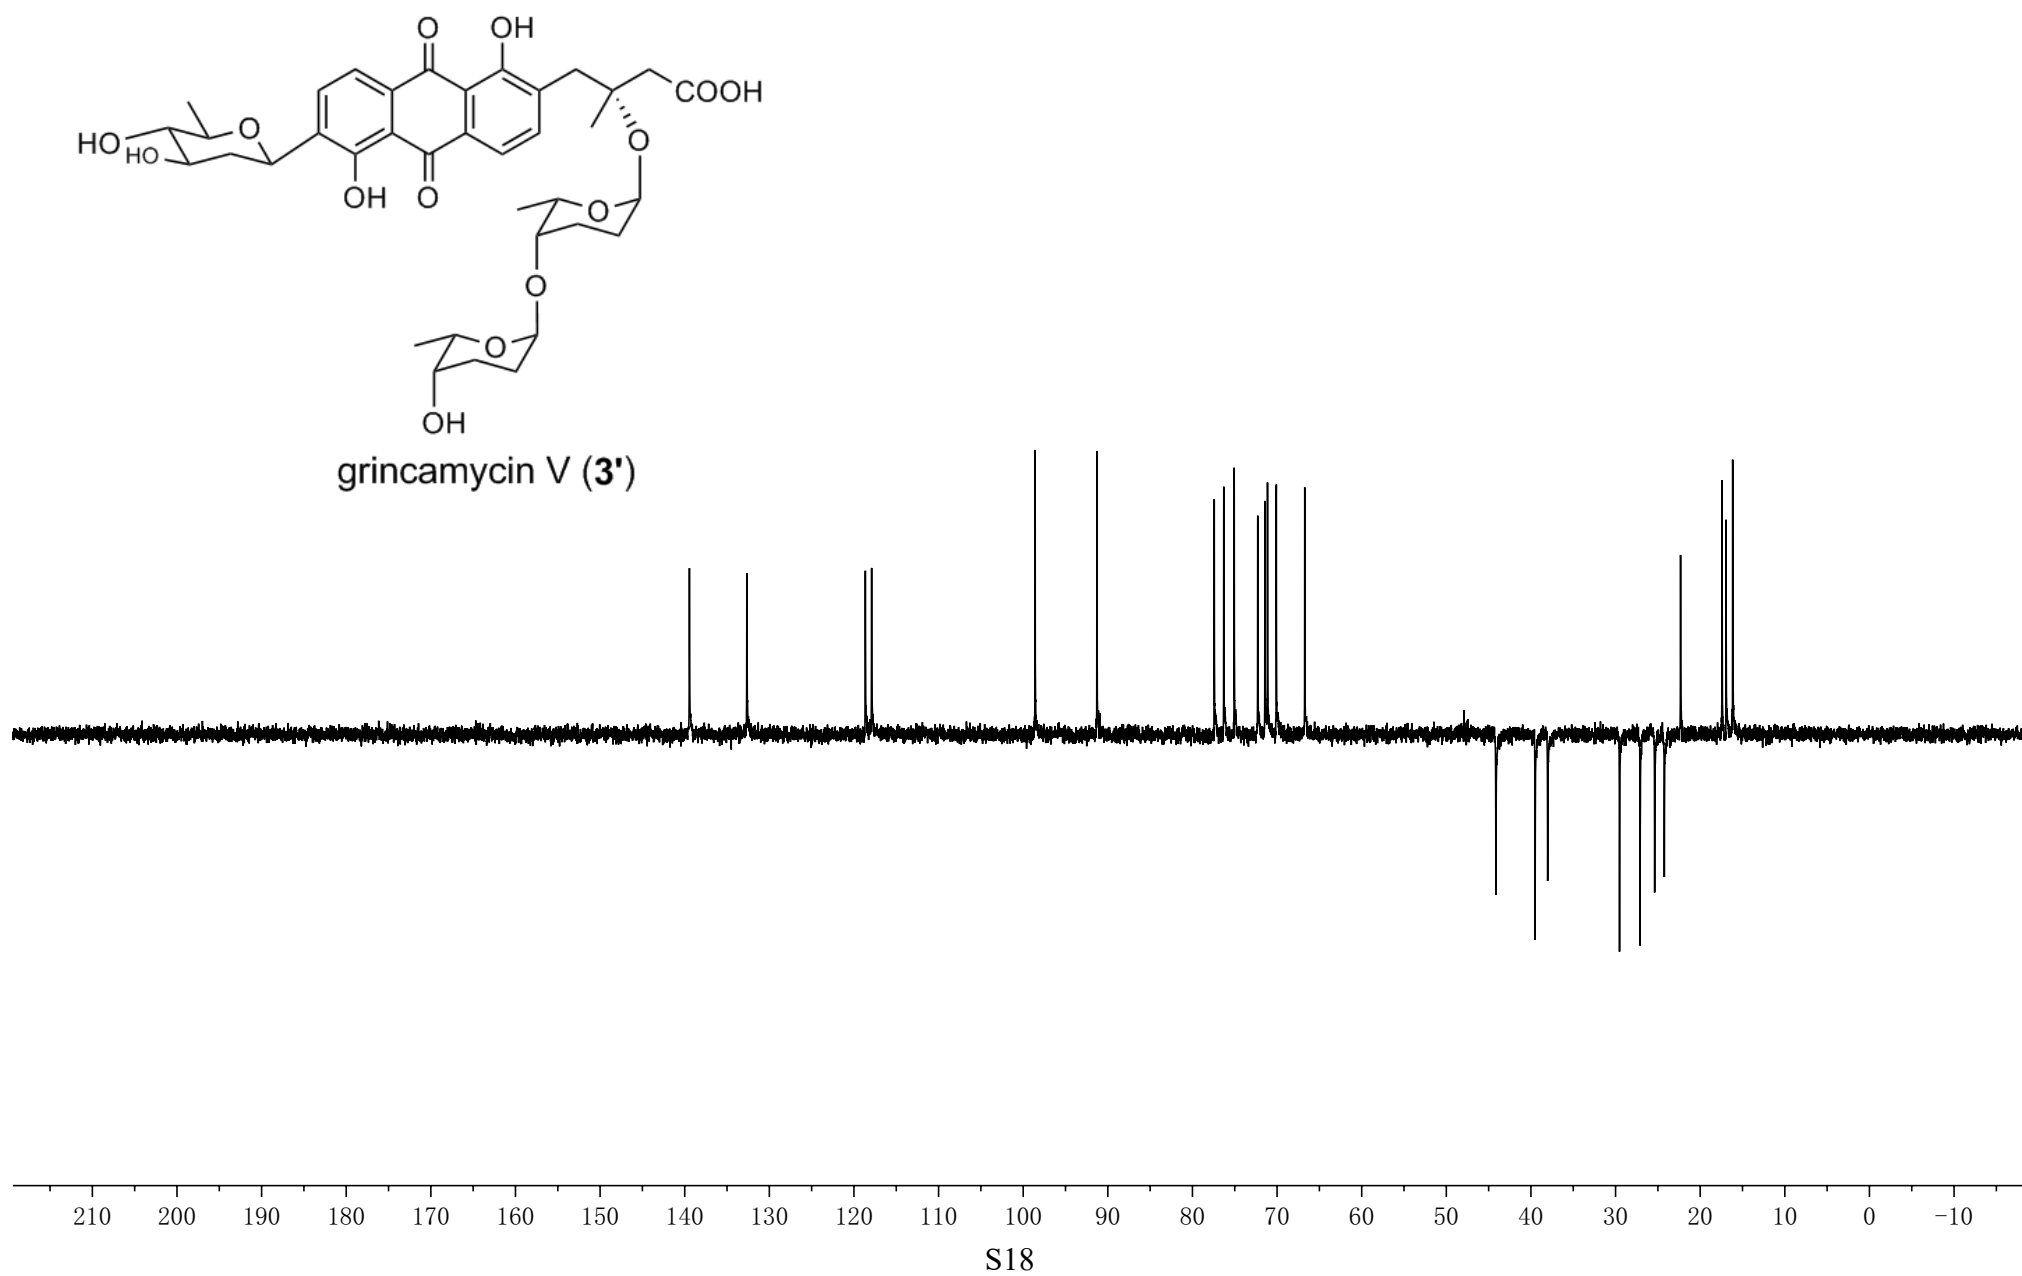

**Figure S20.** The NOESY NMR spectrum of grincamycin V (3') in CD<sub>3</sub>OD.

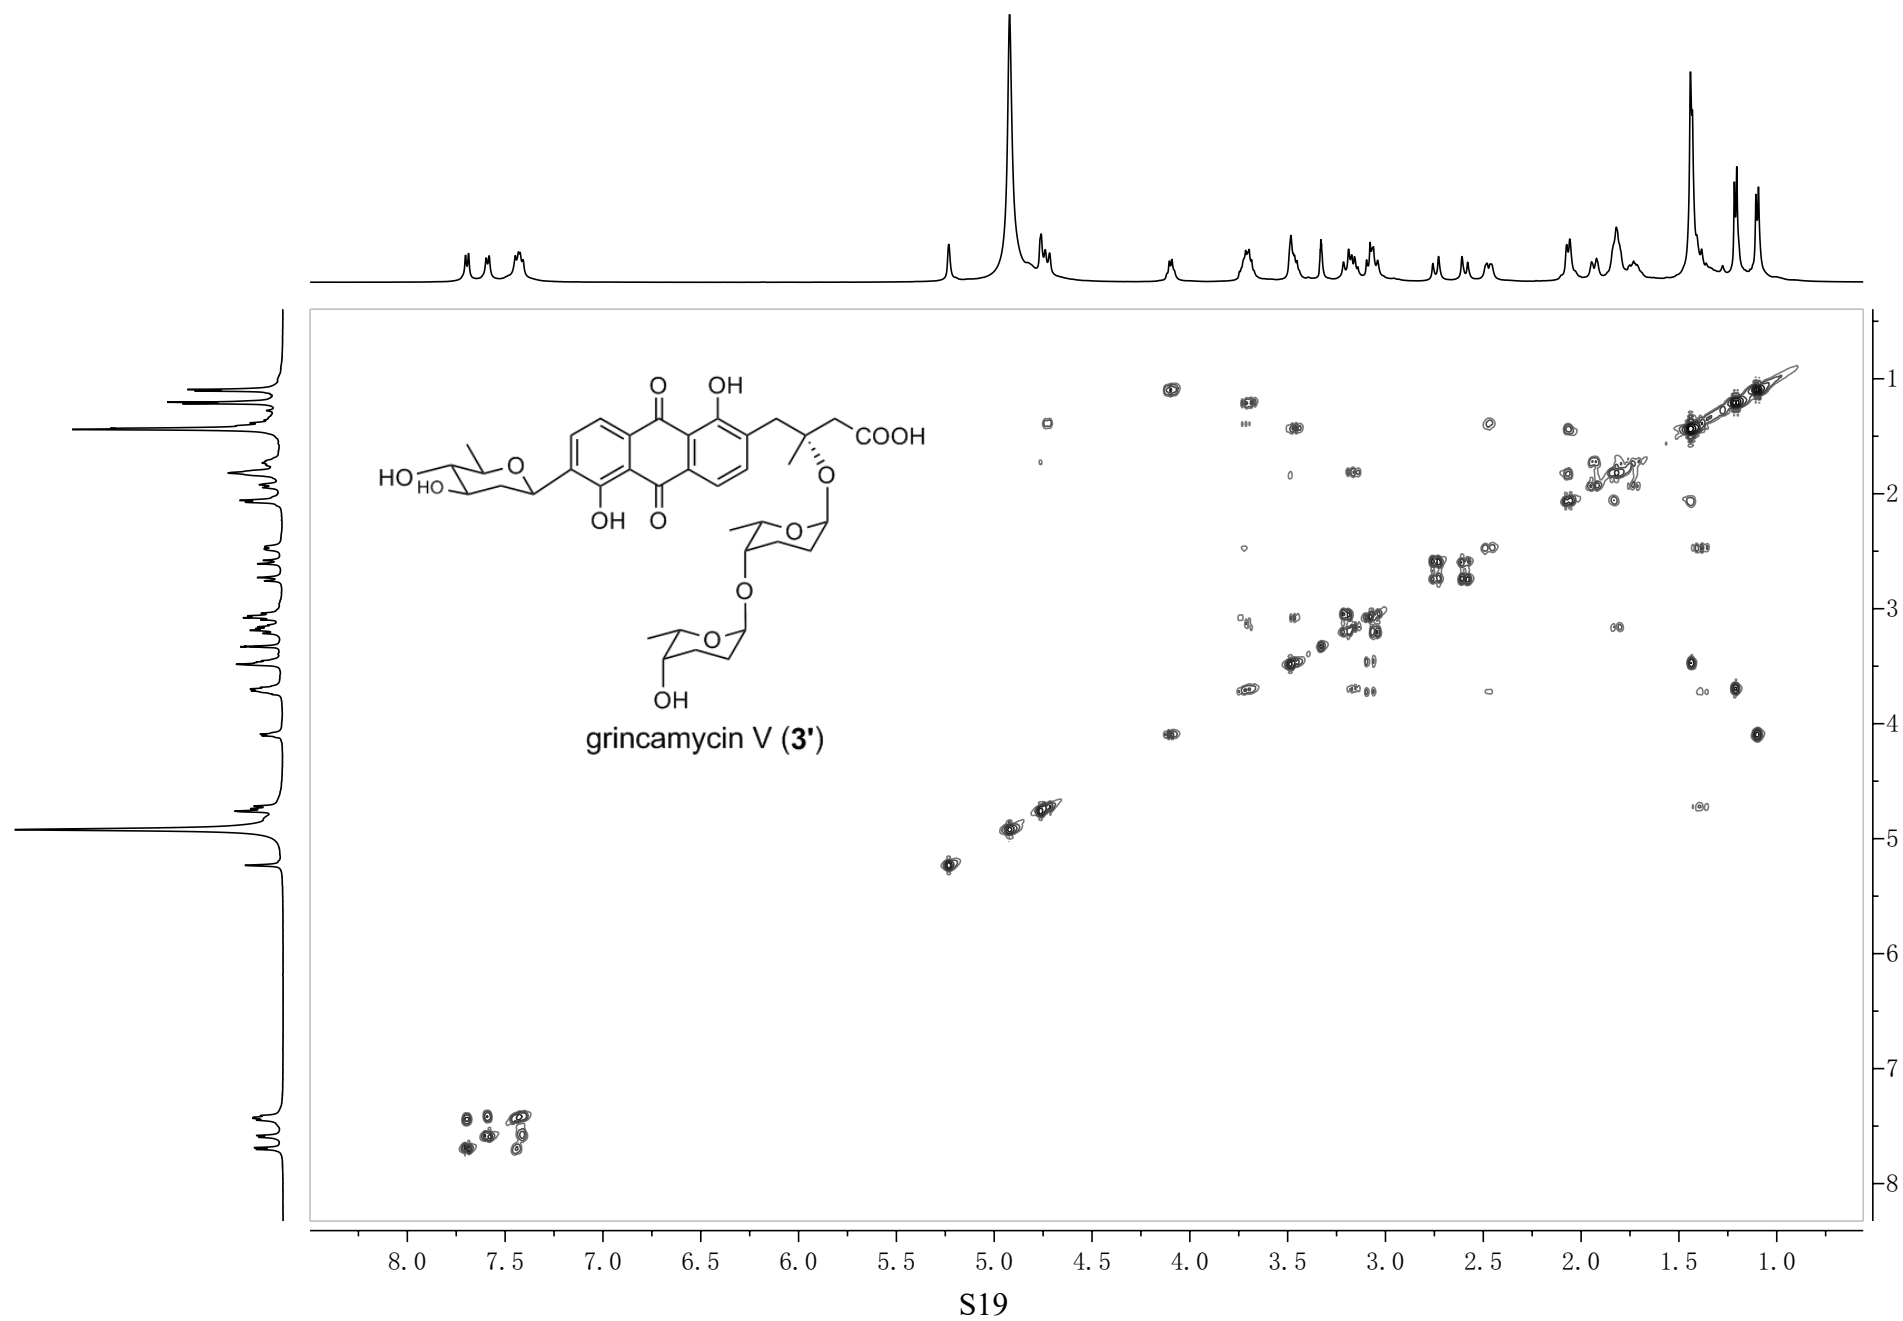

**Figure S21.** The HMQC NMR spectrum of grincamycin V (**3'**) in CD<sub>3</sub>OD.

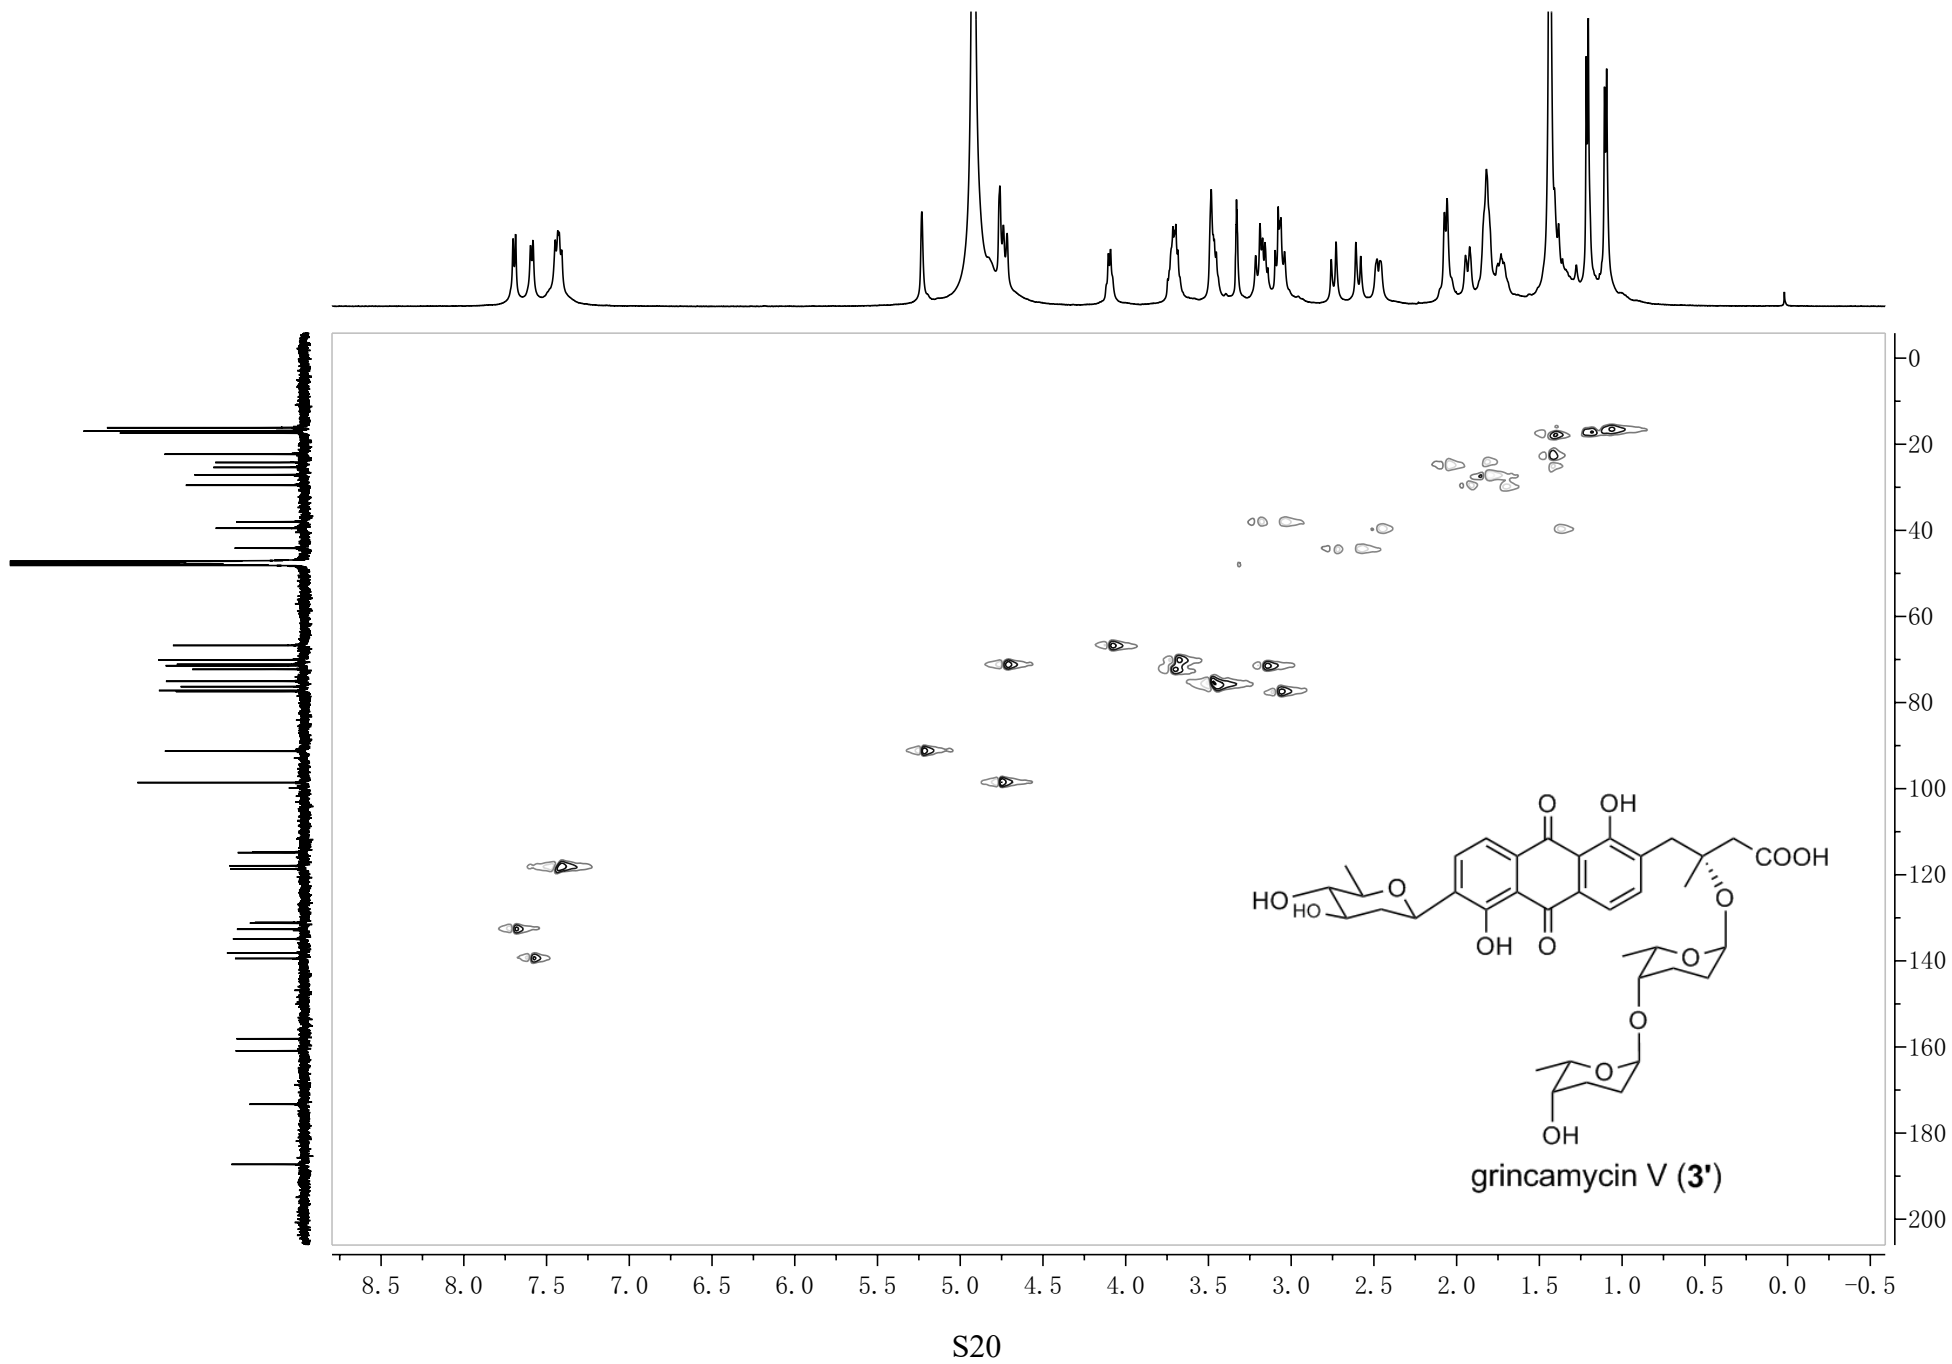

**Figure S22.** The HMBC NMR spectrum of grincamycin V (**3'**) in CD<sub>3</sub>OD.

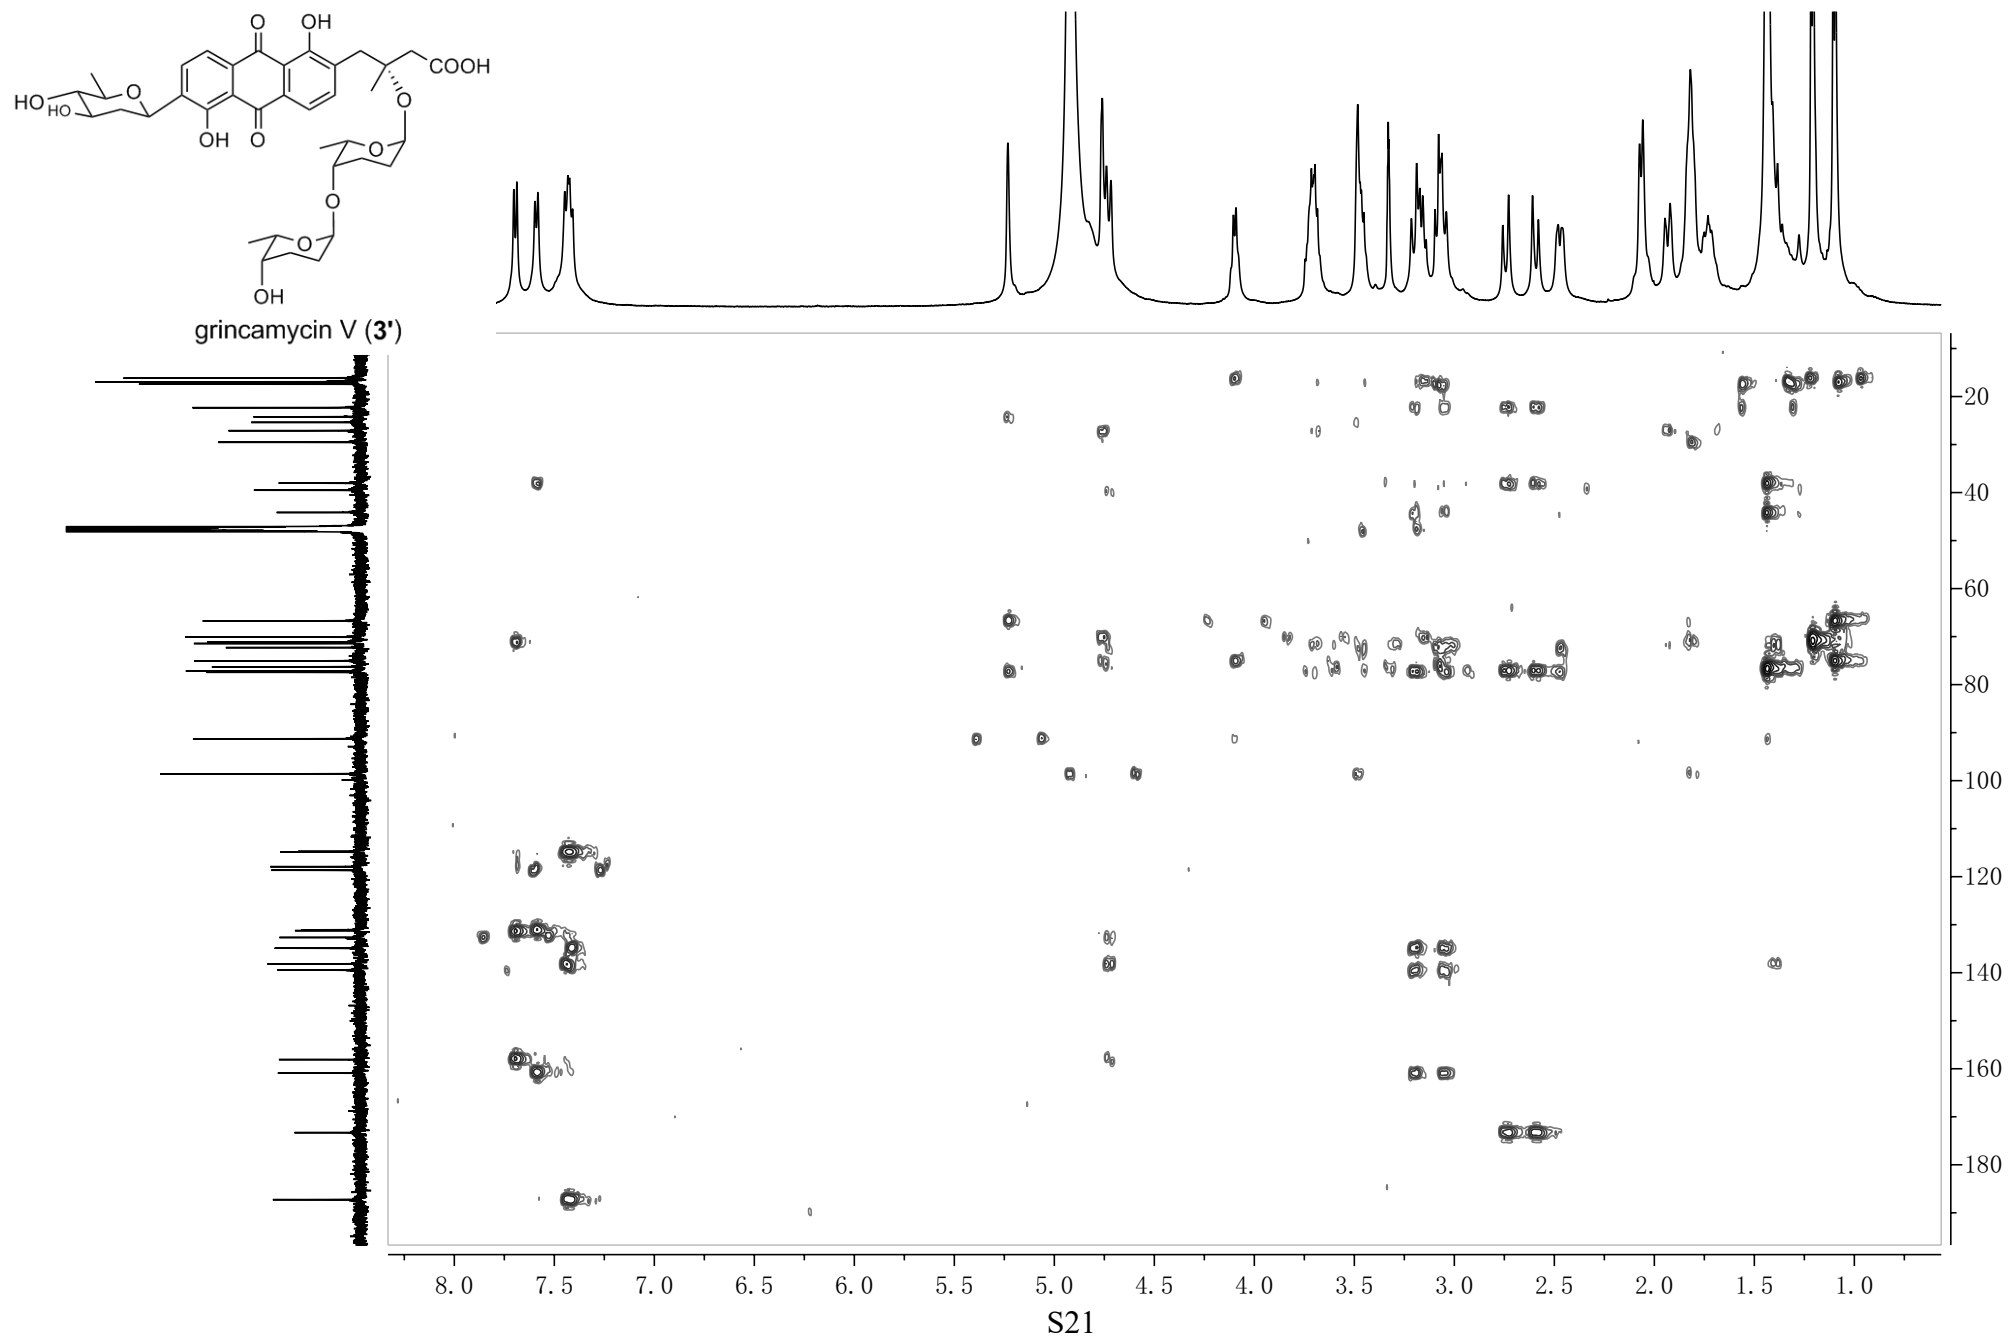

**Figure S23.** The NOESY NMR spectrum of grincamycin V (**3'**) in CD<sub>3</sub>OD.

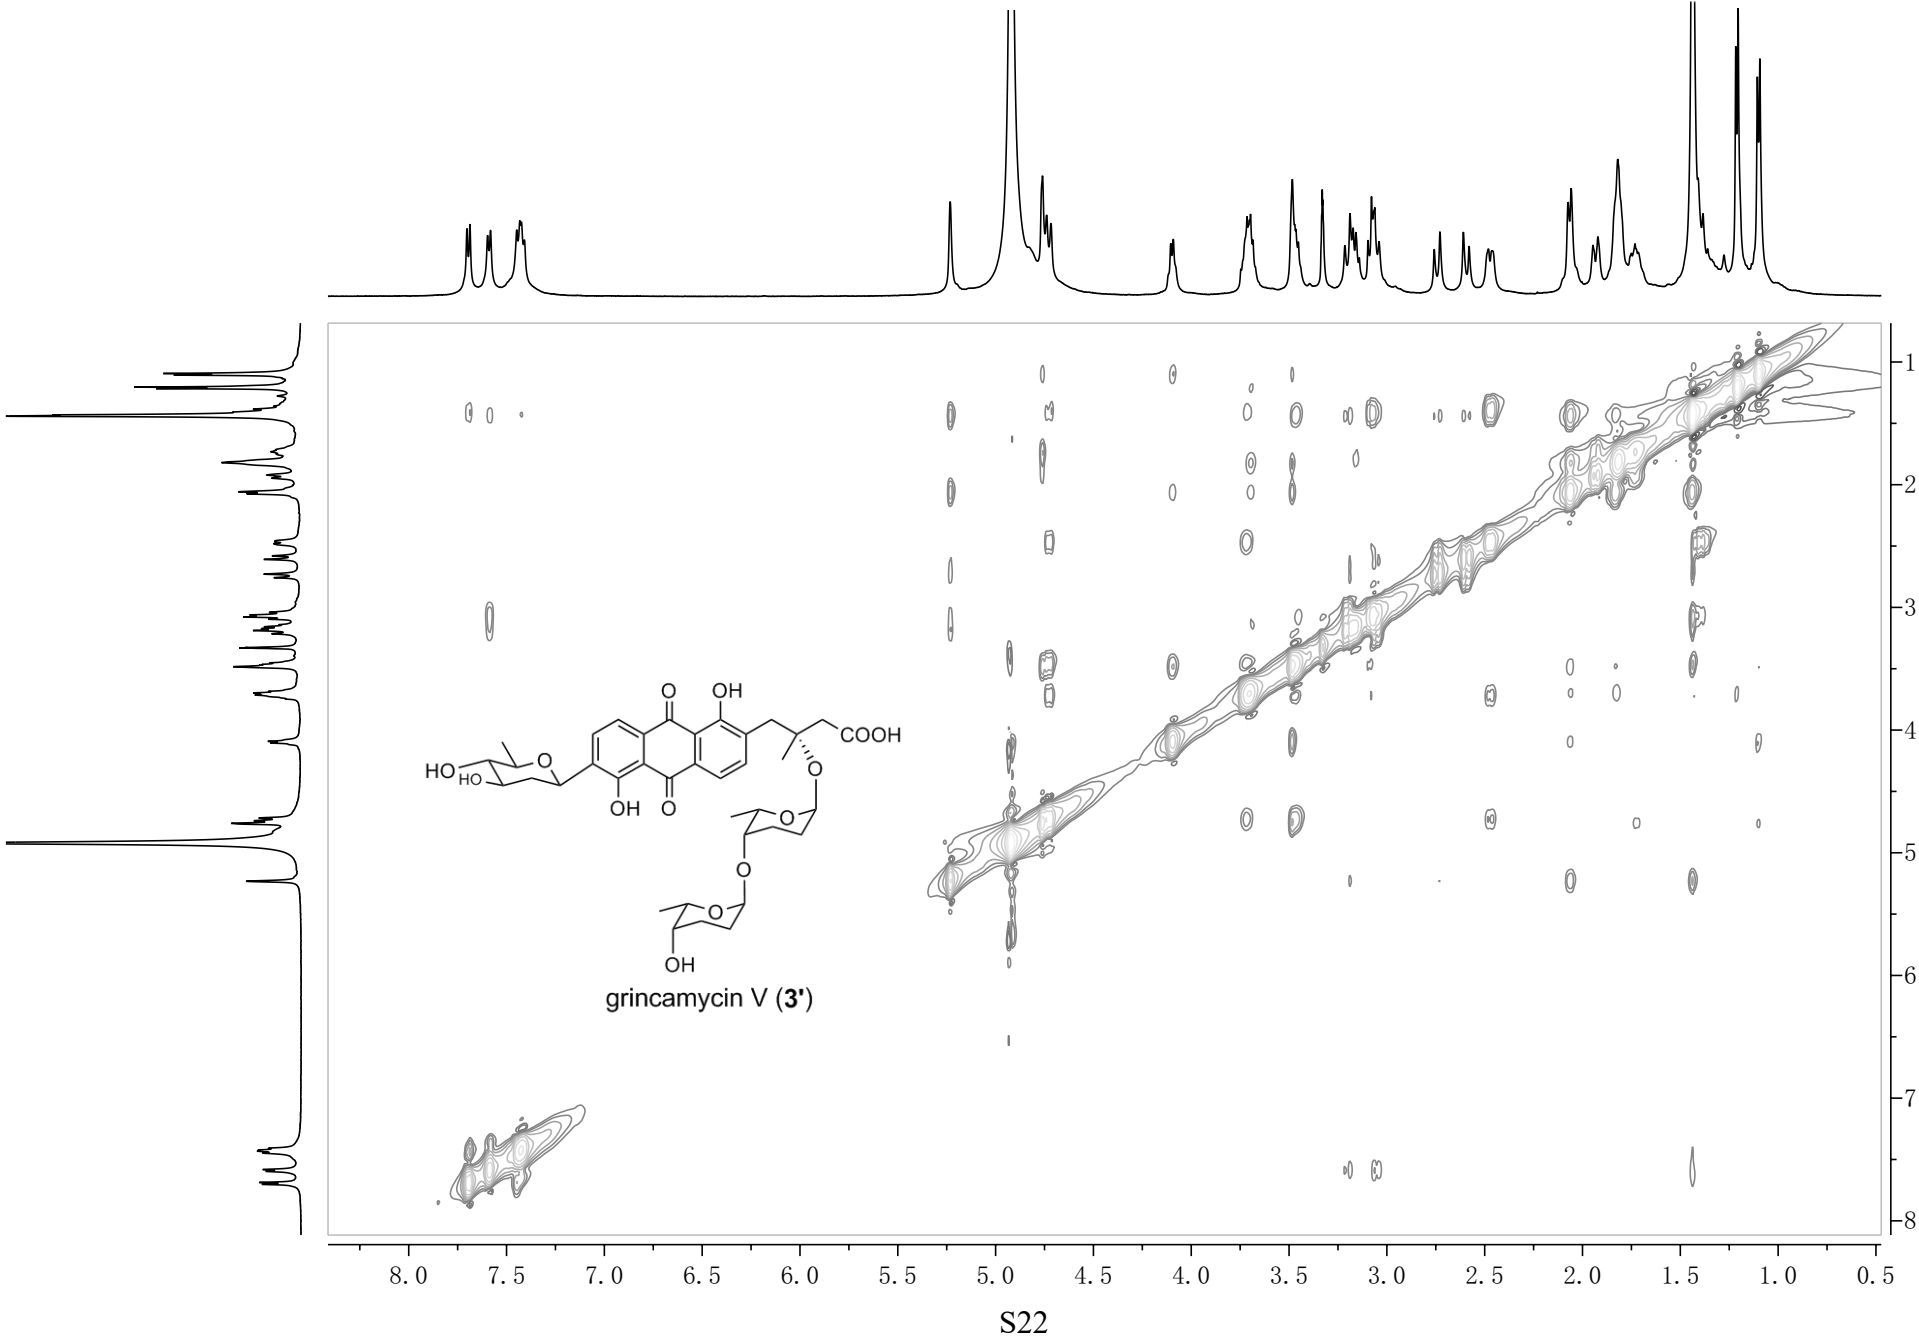

Supplement: s1 [file s1]
